# Supplementary material for: Identification of rheumatoid arthritis and osteoarthritis patients by transcriptome-based rule set generation
Source: Arthritis Res Ther. 2014 Apr 1;16(2):R84. doi: 10.1186/ar4526 (PMC4060460; doi:10.1186/ar4526)
Supplement: Additional file 1 — Calculation of the relevance index. [file ar4526-S1.doc]

Additional File A1

Identification of rheumatoid arthritis and osteoarthritis patients by transcriptome-based rule set generation

Woetzel, Dirk1; Huber, Rene2,3; Kupfer, Peter4; Pohlers, Dirk2,5; Pfaff, Michael1,6; Driesch, Dominik1; Häupl, Thomas7; Koczan; Dirk8; Stiehl, Peter9; Guthke, Reinhard4; Raimund W. Kinne2

1BioControl Jena GmbH, Wildenbruchstr. 15, 07745 Jena, Germany

2Experimental Rheumatology Unit, Department of Orthopedics, Jena University Hospital, Waldkrankenhaus Rudolf Elle, Klosterlausnitzer Str. 81, 07607 Eisenberg, Germany

3Institute of Clinical Chemistry, Hannover Medical School, Carl-Neuberg-Str. 1, 30625 Hannover, Germany

4Leibniz Institute for Natural Product Research and Infection Biology – Hans Knöll Institute, Beutenbergstr. 11a, 07745 Jena, Germany

5Present address: Center of Diagnostics GmbH, Chemnitz Hospital, Chemnitz, Germany

6Department of Medical Engineering and Biotechnology, University of Applied Sciences Jena, Carl-Zeiss-Promenade 2, 07745 Jena, Germany

7Department of Rheumatology and Clinical Immunology, Charite-Universitätsmedizin Berlin, Chariteplatz 1, 10117 Berlin, Germany

8Institute of Immunology, University of Rostock, Schillingallee 68, 18057 Rostock, Germany

9Institute of Pathology, University of Leipzig, Liebigstr. 24, 04103 Leipzig, Germany

**Calculation of the relevance index *RI***

For all rules the relevance index *RI* was calculated according toTroschke [39] based on the probabilities *pCr* and *pCPr* as well as its confidence interval borders *pCr_low, pCr_high, pCPr_low,* and *pCPr_high*as follows.

First, for the rule IF *Pr* THEN *Cr* the following numbers were counted and calculated by summarizing the relevant membership degrees (*Mijk*), respectively:

n = # all samples

a = # (*Pr* true) AND (C*r* true) = *TP*

b = # (*Pr* true) – a = *FP*

c = # (C*r* true) – a = *FN* b+c = Errors

d = n – a – b – c = *TN* a+d = Hits

Using the before mentioned numbers, the probability *pCr* of the conclusion *Cr* and the conditional probability *pCPr* of the conclusion *Cr* under the premise *Pr* were calculated:

Next, the upper bound of the confidence interval of the probability *pCr* and the lower bound of the conditional probability *pCPr* were computed:

The F-quantile was approximated according to Carter [A1] as follows:

Finally, the Relevance Index *RI* results as

# References

A1. Carter A: **Approximation to percentage points of the z-distribution**. *Biometrika* 1947*,* **34**:352-358.
