# Supplementary material for: Identification of rheumatoid arthritis and osteoarthritis patients by transcriptome-based rule set generation
Source: Arthritis Res Ther. 2014 Apr 1;16(2):R84. doi: 10.1186/ar4526 (PMC4060460; doi:10.1186/ar4526)
Supplement: Additional file 6 — Genes (original symbols) and the synonyms used as input for the Pathway Studio 9 search for interactions among the genes. [file ar4526-S6.xls]

## Sheet: AT_Nummern
CG_Jena	CG_Berlin	RA_Jena	RA_Berlin	RA_Leipzig	OA_Jena	OA_Berlin	OA_Leipzig
209305_s_at	203140_at	202307_s_at	AFFX-HUMISGF3A/M97935_3_at	205159_at	220942_x_at	202644_s_at	217986_s_at
200768_s_at	203543_s_at	202269_x_at	202270_at	209702_at	209194_at	202016_at	214647_s_at
203574_at	219371_s_at	205842_s_at	204994_at	214647_s_at	203613_s_at	212157_at	205159_at
203341_at	203574_at	202291_s_at	202037_s_at	217986_s_at	202263_at	208895_s_at	209702_at
AFFX-CreX-3_at	212099_at	40420_at	204613_at		207974_s_at
202284_s_at	203725_at	213079_at	221844_x_at		201405_s_at
214336_s_at	201137_s_at	219648_at	201348_at		217526_at
207574_s_at	212665_at	204362_at	202269_x_at		218902_at
218155_x_at		212543_at			219561_at
		207808_s_at			213165_at

## Sheet: Symbols and Synonyms
Original Symbol	Symbol/Synonym used for PathwayStudio9 Search
CG_Jena
GADD45B	GADD45B
MAT2A	MAT2A
NFIL3	NFIL3
CBF2	CEBPZ
CRE	CREB5
CDKN1A	CDKN1A
COPA	COPA
GADD45B	GADD45B
FLJ10534	TSR1
CG_Berlin
BCL6	BCL6
BTEB1	KLF9
LOC51713	none
NFIL3	NFIL3
ARHB	RHOB
GADD45A	GADD45A
HLA-DPB1	HLA-DPB1
Hs.12813	none
OA Jena
E2IG5	FAM162A
CETN2	CETN2
NDUFB6	NDUFB6
LOC51706	LOC51706
SKP1A	SKP1
MOV34-34KD	COPS6
Hs.192789	none
FLJ20005	FLJ20005
LOC51226	COPZ2
Hs.323748	CEP350
OA_Berlin
TNFAIP3	TNFAIP3
MEST	MEST
SDC2	SDC2
Hs.100555	DDX18
OA_Leipzig
BAZ1A	BAZ1A
HFE	HFE
CSF2RB	CSF2RB
MGC5149	FTO
RA_Jena
ABCB2	TAP1
GBP1	GBP1
JAK2	JAK2
MGP	MGP
Hs.16134	STK10
Hs.178207	TSR2
FLJ10116	MREG
SKAP-HOM	SKAP2
AIM1	AIM1
PROS1	PROS1
RA_Berlin
ISGF-3	STAT1
GBP1	GBP1
MX2	MX2
SFRP1	SFRP1
PLCG2	PLCG2
Hs.13323	ZNF574
GPX3	GPX3
GBP1	GBP1
RA_Leipzig
Hs.285401	CSF2RB
MGC5149	FTO
HFE	HFE
BAZ1A	BAZ1A
