# Supplementary material for: Identification of rheumatoid arthritis and osteoarthritis patients by transcriptome-based rule set generation
Source: Arthritis Res Ther. 2014 Apr 1;16(2):R84. doi: 10.1186/ar4526 (PMC4060460; doi:10.1186/ar4526)
Supplement: Additional file 7 — Interactions among the genes in the pruned rule sets (CG). Interactions found by Pathway Studio among the genes contained in the pruned rule sets of the ‘Jena’ and ‘Berlin’ datasets for the conclusion ‘CG’. [file ar4526-S7.xls]

## Sheet: Interaction Table
Interaction	Type	Effect	Sentence	MedLine Reference	Connectivity	# of References	Owner	CellType	CellLineName	Mechanism	MedlineTA	Organ	Organism	TextRef	Tissue
RHOB --+> CDKN1A	Regulation	positive	RhoB subsequently induces p21WAF1/CIPI which inhibits cell growth (Copland et al. 2006a,b)., Both Farnesyltransferase inhibitor treatment and RhoB-GG elevation can activate p21WAF1 in certain settings (24 , 41) ., Conversely, in TGF-ß-resistant tumor cells, lack of TGF-ß signals would decrease the RhoB protein level, contributing to the dysregulation of RhoB-regulated molecules such as p21waf1/ci…	18987168:1300, 10554025:1132, 11741970:1284	2	3					Endocr Relat Cancer, Cancer Res, J Biol Chem			info:pmid/18987168#body:301, info:pmid/10554025#body:133, info:pmid/11741970#body:285
BCL6 ---> GADD45B	Regulation		BCL6 disruption of the p53 program is even more extensive, because we find that BCL6 can directly repress GADD45A and reported previously that BCL6 directly regulates additional DNA damage checkpoint genes, including GADD45B and CHEK1 (6).	18451163:1310	2	1					Cancer Res			info:pmid/18451163#body:311
BCL6 ---> CDKN1A	Regulation	unknown	Thus, the mechanism by which BCL6 suppresses BCL2 is analogous to the BCL6-mediated suppression of CDKN1A (32)., BCL6 interacts with the transcription factor Miz-1 to suppress the cyclin-dependent kinase inhibitor p21 and cell cycle arrest in germinal center B cells.	19549844:1143, 16142238:100	2	2		B-Lymphocytes			Proc Natl Acad Sci U S A, Nat Immunol	germinal center of lymph node		info:pmid/19549844#body:144, info:pmid/16142238#title:1
GADD45A ---| CDKN1A	DirectRegulation	negative	Gadd45 protein has been shown to interact with PCNA and also p21waf1., Binding of recombinant Gadd45 protein to overlapping p21Cip1 peptides in ELISA assays and use of the yeast two hybrid assay show that Gadd45 directly interacts with this cell cycle inhibitor., Gadd45 and to a lesser extent Gadd153 (stress genes induced by, e.g., ionizing radiation and ischaemia) were up-regulated, as well as p…	11063132:1, 7478594:4, 10912181:12, 10973963:1050, 11498536:1046, 15623554:1059, 10327059:1071, 18296737:1310, 11022036:1215, 12164919:1213 <more data available...>	2	23		Epithelial Cells, Fibroblasts, Keratinocytes	H1299 {CellLine urn:agi-cellline:11010154}, RKO {CellLine urn:agi-cellline:11008915}, HeLa {CellLine urn:agi-cellline:11013434}	direct interaction	Cell Prolif, Oncogene, Biorheology, J Biol Chem, Proc Natl Acad Sci U S A, Exp Biol Med (Maywood), J Invest Dermatol, J Pharmacol Exp Ther, J Nutr, Nucleic Acids Res <more data available...>	Ovary, Mesoderm, Bronchi	Mesocricetus auratus, Homo sapiens	info:pmid/11063132#abs:2, info:pmid/7478594#abs:5, info:pmid/10912181#abs:13, info:pmid/10973963#body:51, info:pmid/11498536#body:47, info:pmid/15623554#body:60, info:pmid/10327059#body:72, info:pmid/18296737#body:311, info:pmid/11022036#body:216, info:pmid/12164919#body:214 <more data available...>	Feces
GADD45A --+> GADD45B	Expression	positive	For example, the expression of GADD45ß, but not GADD45a or -?, is induced by transforming growth factor ß (35) and the expression of GADD45a, but not GADD45ß or -?, is modulated by p53 (25)., In contrast, MyD118 expression was slightly induced in 30 min in response to OSM, and GADD45 mRNA was present at a constant level regardless of the presence or absence of OSM.	17242196:1389, 10455148:1162	2	2		hematopoietic cells			Mol Cell Biol, J Biol Chem			info:pmid/17242196#body:390, info:pmid/10455148#body:163
KLF9 --+> CDKN1A	Expression	positive	However, while BTEB1 and its ubiquitous family member Sp1 increased basal p21(WAF1) and IGFBP-2 transcription when added as expression constructs in the parental Hec-1-A cell line, only Sp1 activated Axl transcription, despite the presence in all three gene promoters of GC-enriched regions that presumably can bind BTEB1 and Sp1 with similar affinities.	11953011:7	2	1			HEC 1A {CellLine urn:agi-cellline:11012099}		DNA Cell Biol			info:pmid/11953011#abs:8
GADD45A ---- GADD45B	Binding		Tag-specific immunoprecipitation showed that Gadd45a co-precipitates with both Gadd45b and Gadd45g (Fig. 6 B, upper panels)., Consistent with MyD118/Gaddd45 interacting domains within the N-terminal region of PCNA, PCNA-(1-149) and PCNA-(1-127) peptides interacted with MyD118 and Gadd45 also.	11498536:1289, 10828065:1119	2	2			RKO {CellLine urn:agi-cellline:11008915}		J Biol Chem			info:pmid/11498536#body:290, info:pmid/10828065#body:120
