# Supplementary material for: Identification of rheumatoid arthritis and osteoarthritis patients by transcriptome-based rule set generation
Source: Arthritis Res Ther. 2014 Apr 1;16(2):R84. doi: 10.1186/ar4526 (PMC4060460; doi:10.1186/ar4526)
Supplement: Additional file 9 — Gene enrichment analysis for molecular interpretation (CG). Gene enrichment analysis for molecular interpretation of the obtained rule set for the conclusion ‘CG’ using the GO terms biological process (BP) and molecular function (MF), as well as KEGG pathways. The analyses were performed separately for the ‘CG’ rules showing a high or low expression level. Category = type of term (GO term/KEEG pathway); Term = denomination of term (interesting terms highlighted in grey); Count = list hits; number of genes in the rule set belonging to the term in question; p value = EASE score (upper boundary of the distribution of Jackknife Fisher exact probabilities given the actual Count, List Total, Pop Hits, and Pop Total); Genes = gene symbols of included rules/genes; List Total = number of genes in the rule set (for high and low expression, respectively); Pop Hits = number of genes in the population background belonging to the specific term; Pop Total = number of genes in the population background; BH-adjusted p value = Benjamini-Hochberg adjusted P value (threshold P ≤ 0.05 indicated by fat frame). [file ar4526-S9.xls]

## Sheet: CG High BP
Category	Term	Count	p value	Genes	List Total	Pop Hits	Pop Total	BH-adjusted p value
GOTERM_BP_FAT	GO:0010033~response to organic substance	24	3.832958531246398E-7	HSP90AB1, IL1R1, MCL1, LDLR, IL6ST, RHOQ, NFKBIA, HSPA1A, HSPA1B, PTEN, PLIN2, HSPE1, TXNIP, IRS2, HSP90AA1, SOCS2, MAT2A, FADS1, JUNB, GRB10, ADM, ID2, JUN, HSPD1, DNAJB1	132	721	13528	6.35458842179748E-4
GOTERM_BP_FAT	GO:0006357~regulation of transcription from RNA polymerase II promoter	24	4.4337640957763903E-7	CNBP, CEBPB, KLF9, CCNH, KLF11, NFKBIA, RHOQ, FOXO3, SPEN, CSDA, MED13L, TCF7L2, JUNB, SAP30, ATF4, ID2, JUN, VEGFA, JUND, TGIF1, CHD1, BCL6, ABL1, KLF4	132	727	13528	7.350649001369725E-4
GOTERM_BP_FAT	GO:0010608~posttranscriptional regulation of gene expression	13	9.448937594503022E-7	ZFP36, GTPBP4, MKNK2, EIF1B, PTEN, ZFP36L2, PA2G4, EIF3B, SERBP1, VEGFA, QKI, EIF1, HSPD1	132	211	13528	0.001566514385098472
GOTERM_BP_FAT	GO:0043066~negative regulation of apoptosis	16	1.6737367591707915E-6	IER3, CEBPB, SOCS2, MCL1, PIM1, NFKBIA, HSPA1A, HSPA1B, CSDA, PTEN, TCF7L2, BAG3, VEGFA, BCL6, HSPD1, HSPA5, HSPA9	132	354	13528	0.002774828173590649
GOTERM_BP_FAT	GO:0043069~negative regulation of programmed cell death	16	1.991421070001139E-6	IER3, CEBPB, SOCS2, MCL1, PIM1, NFKBIA, HSPA1A, HSPA1B, CSDA, PTEN, TCF7L2, BAG3, VEGFA, BCL6, HSPD1, HSPA5, HSPA9	132	359	13528	0.0033014974345380033
GOTERM_BP_FAT	GO:0060548~negative regulation of cell death	16	2.0610998096775053E-6	IER3, CEBPB, SOCS2, MCL1, PIM1, NFKBIA, HSPA1A, HSPA1B, CSDA, PTEN, TCF7L2, BAG3, VEGFA, BCL6, HSPD1, HSPA5, HSPA9	132	360	13528	0.003417013178752537
GOTERM_BP_FAT	GO:0045449~regulation of transcription	48	5.3357785482109285E-6	CNBP, TAF1D, NFKBIA, RHOQ, PHF20, FOXO3, TCF7L2, ZNF331, CCDC59, BZW1, SAP30, JUND, CEBPZ, CHD1, ZNF395, BCL6, BHLHE40, NFIL3, TXNIP, CEBPB, KLF9, CEBPD, CCNH, FADS1, ARID5B, KLF11, PIM1, CCNL1, AFF1, SPEN, CSDA, MED13L, JUNB, RLF, HNRPDL, PA2G4, ATF4, ID2, BTG1, JUN, ETS2, VEGFA, PNRC1, TGIF1, DNTTIP2, ABL1, KLF2, KLF4	132	2601	13528	0.008845743651542115
GOTERM_BP_FAT	GO:0042127~regulation of cell proliferation	23	6.203507550276818E-6	TXNIP, NAMPT, GTPBP4, IRS2, CNBP, IL6ST, KLF11, NAP1L1, NFKBIA, JAG1, PTEN, CBLB, ID2, ADM, BTG1, JUN, VEGFA, TGIF1, ADAMTS1, BCL6, KLF4, TOB2, TOB1	132	787	13528	0.010284209911648468
GOTERM_BP_FAT	GO:0042981~regulation of apoptosis	23	8.710189016317392E-6	RTN4, TXNIP, IER3, CEBPB, MCL1, SOCS2, PIM1, NFKBIA, HSPA1A, HSPA1B, FOXO3, CSDA, TCF7L2, PTEN, BTG1, JUN, BAG3, VEGFA, HSPE1, BCL6, HSPA5, HSPD1, ABL1, HSPA9	132	804	13528	0.014439518687603403
GOTERM_BP_FAT	GO:0043067~regulation of programmed cell death	23	1.0182225228550108E-5	RTN4, TXNIP, IER3, CEBPB, MCL1, SOCS2, PIM1, NFKBIA, HSPA1A, HSPA1B, FOXO3, CSDA, TCF7L2, PTEN, BTG1, JUN, BAG3, VEGFA, HSPE1, BCL6, HSPA5, HSPD1, ABL1, HSPA9	132	812	13528	0.016879627454946533
GOTERM_BP_FAT	GO:0010941~regulation of cell death	23	1.0790071917567669E-5	RTN4, TXNIP, IER3, CEBPB, MCL1, SOCS2, PIM1, NFKBIA, HSPA1A, HSPA1B, FOXO3, CSDA, TCF7L2, PTEN, BTG1, JUN, BAG3, VEGFA, HSPE1, BCL6, HSPA5, HSPD1, ABL1, HSPA9	132	815	13528	0.017887203215094516
GOTERM_BP_FAT	GO:0048008~platelet-derived growth factor receptor signaling pathway	5	2.9081721972603807E-5	TXNIP, ZFAND5, ARID5B, VEGFA, PTEN	132	19	13528	0.04820325251952973
GOTERM_BP_FAT	GO:0006916~anti-apoptosis	11	3.1364618387963665E-5	IER3, CEBPB, SOCS2, MCL1, BAG3, VEGFA, NFKBIA, HSPA1A, HSPA5, HSPA1B, TCF7L2, HSPA9	132	206	13528	0.05198625235055543
GOTERM_BP_FAT	GO:0051252~regulation of RNA metabolic process	36	3.556184171137914E-5	CNBP, NFKBIA, RHOQ, FOXO3, TCF7L2, ZNF331, ZFP36L2, SAP30, JUND, CHD1, ZNF395, BCL6, BHLHE40, NFIL3, ZFP36, CEBPB, KLF9, CCNH, CEBPD, ARID5B, KLF11, AFF1, SPEN, CSDA, MED13L, JUNB, PA2G4, ATF4, ID2, JUN, SERBP1, ETS2, VEGFA, TGIF1, ABL1, KLF4	132	1813	13528	0.058941142438251326
GOTERM_BP_FAT	GO:0045637~regulation of myeloid cell differentiation	7	5.80186200959822E-5	ZFP36, ID2, JUN, NFKBIA, JAG1, FOXO3, TOB2	132	70	13528	0.09614478618439337
GOTERM_BP_FAT	GO:0007167~enzyme linked receptor protein signaling pathway	13	1.2032258906407187E-4	TXNIP, ZFAND5, IRS2, SOCS2, IL6ST, ARID5B, RAF1, RHOQ, PTEN, GRB10, JUN, VEGFA, TOB1	132	342	13528	0.19929425459217498
GOTERM_BP_FAT	GO:0006913~nucleocytoplasmic transport	9	1.3632808835300185E-4	CBLB, AGFG1, JUN, NFKBIA, BCL6, NXF1, HNRNPA1, TOB1, HSPA9	132	156	13528	0.22577654536459768
GOTERM_BP_FAT	GO:0006350~transcription	38	1.433948526077224E-4	CNBP, NACA, TAF1D, PHF20, FOXO3, TCF7L2, ZNF331, CCDC59, BZW1, SAP30, JUND, CEBPZ, ZNF395, BCL6, BHLHE40, NFIL3, TXNIP, CEBPB, KLF9, CEBPD, CCNH, ARID5B, KLF11, CCNL1, SPEN, CSDA, MED13L, JUNB, RLF, HNRPDL, PA2G4, ATF4, JUN, PNRC1, TGIF1, DNTTIP2, KLF2, KLF4	132	2101	13528	0.23746693171815547
GOTERM_BP_FAT	GO:0051169~nuclear transport	9	1.4888904147713697E-4	CBLB, AGFG1, JUN, NFKBIA, BCL6, NXF1, HNRNPA1, TOB1, HSPA9	132	158	13528	0.24655495323833154
GOTERM_BP_FAT	GO:0001944~vasculature development	11	1.6321335625610767E-4	RTN4, ZFAND5, JUN, VEGFA, RHOB, QKI, JAG1, NCL, PTEN, TCF7L2, JUNB	132	251	13528	0.27024536256567977
GOTERM_BP_FAT	GO:0008285~negative regulation of cell proliferation	13	1.9912024083507137E-4	GTPBP4, KLF11, PTEN, CBLB, ADM, BTG1, JUN, TGIF1, BCL6, ADAMTS1, TOB2, KLF4, TOB1	132	361	13528	0.32960708344639267
GOTERM_BP_FAT	GO:0009968~negative regulation of signal transduction	10	2.969737689226101E-4	CBLB, GRB10, SOCS2, RGS2, IL6ST, NFKBIA, TGIF1, BCL6, PTEN, TOB1	132	221	13528	0.49121129830073107
GOTERM_BP_FAT	GO:0006355~regulation of transcription, DNA-dependent	33	3.002297936982968E-4	CNBP, NFKBIA, RHOQ, FOXO3, TCF7L2, ZNF331, SAP30, JUND, CHD1, ZNF395, BCL6, BHLHE40, NFIL3, CEBPB, KLF9, CCNH, CEBPD, ARID5B, KLF11, AFF1, SPEN, CSDA, MED13L, JUNB, ATF4, PA2G4, ID2, JUN, ETS2, VEGFA, TGIF1, ABL1, KLF4	132	1773	13528	0.4965843586535512
GOTERM_BP_FAT	GO:0031328~positive regulation of cellular biosynthetic process	18	3.258077593593025E-4	HSP90AB1, IRS2, CNBP, CEBPB, HSP90AA1, CCNH, NFKBIA, RHOQ, AFF1, FOXO3, TCF7L2, JUNB, ATF4, JUN, ETS2, VEGFA, KLF2, KLF4	132	685	13528	0.5387833866917102
GOTERM_BP_FAT	GO:0007169~transmembrane receptor protein tyrosine kinase signaling pathway	10	3.2797118924361604E-4	TXNIP, ZFAND5, IRS2, GRB10, SOCS2, ARID5B, VEGFA, RAF1, RHOQ, PTEN	132	224	13528	0.5423518841629726
GOTERM_BP_FAT	GO:0051094~positive regulation of developmental process	11	3.704776231809351E-4	ID2, BTG1, IL6ST, JUN, JUND, TGIF1, RHOB, JAG1, FOXO3, TOB2, JUNB	132	278	13528	0.6124402739667967
GOTERM_BP_FAT	GO:0009891~positive regulation of biosynthetic process	18	3.85165823429951E-4	HSP90AB1, IRS2, CNBP, CEBPB, HSP90AA1, CCNH, NFKBIA, RHOQ, AFF1, FOXO3, TCF7L2, JUNB, ATF4, JUN, ETS2, VEGFA, KLF2, KLF4	132	695	13528	0.6366486933833237
GOTERM_BP_FAT	GO:0051173~positive regulation of nitrogen compound metabolic process	17	4.8768342561787925E-4	HSP90AB1, CNBP, CEBPB, HSP90AA1, CCNH, NFKBIA, RHOQ, AFF1, FOXO3, TCF7L2, JUNB, ATF4, JUN, ETS2, VEGFA, KLF2, KLF4	132	644	13528	0.8054592782983372
GOTERM_BP_FAT	GO:0051789~response to protein stimulus	7	5.974527168407482E-4	HSP90AB1, HSP90AA1, ID2, HSPE1, HSPA1A, DNAJB1, HSPD1, HSPA1B	132	107	13528	0.9859120690390188
GOTERM_BP_FAT	GO:0006986~response to unfolded protein	6	6.157248453864592E-4	HSP90AB1, HSP90AA1, HSPE1, HSPA1A, DNAJB1, HSPD1, HSPA1B	132	71	13528	1.0159201646910532
GOTERM_BP_FAT	GO:0001568~blood vessel development	10	6.286055310449436E-4	RTN4, JUN, VEGFA, RHOB, QKI, JAG1, NCL, PTEN, TCF7L2, JUNB	132	245	13528	1.0370688231147729
GOTERM_BP_FAT	GO:0010648~negative regulation of cell communication	10	6.857959124873908E-4	CBLB, GRB10, SOCS2, RGS2, IL6ST, NFKBIA, TGIF1, BCL6, PTEN, TOB1	132	248	13528	1.130917823564448
GOTERM_BP_FAT	GO:0045893~positive regulation of transcription, DNA-dependent	14	7.264479993644347E-4	CNBP, CEBPB, CCNH, NFKBIA, RHOQ, FOXO3, AFF1, TCF7L2, JUNB, ATF4, ETS2, JUN, VEGFA, KLF4	132	477	13528	1.197576744491391
GOTERM_BP_FAT	GO:0051254~positive regulation of RNA metabolic process	14	7.847415154114837E-4	CNBP, CEBPB, CCNH, NFKBIA, RHOQ, FOXO3, AFF1, TCF7L2, JUNB, ATF4, ETS2, JUN, VEGFA, KLF4	132	481	13528	1.2930893569043977
GOTERM_BP_FAT	GO:0045944~positive regulation of transcription from RNA polymerase II promoter	12	9.55153872280168E-4	CNBP, ATF4, CEBPB, CCNH, JUN, VEGFA, NFKBIA, RHOQ, FOXO3, TCF7L2, KLF4, JUNB	132	371	13528	1.5718088486768367
GOTERM_BP_FAT	GO:0048514~blood vessel morphogenesis	9	0.0010293051504760144	RTN4, JUN, VEGFA, RHOB, QKI, JAG1, NCL, PTEN, JUNB	132	211	13528	1.6928565917292637
GOTERM_BP_FAT	GO:0045941~positive regulation of transcription	15	0.0011240139746352643	CNBP, CEBPB, CCNH, NFKBIA, RHOQ, FOXO3, AFF1, TCF7L2, JUNB, ATF4, JUN, ETS2, VEGFA, KLF2, KLF4	132	564	13528	1.8472599295205172
GOTERM_BP_FAT	GO:0043488~regulation of mRNA stability	4	0.0011944461356727962	ZFP36, ZFP36L2, SERBP1, VEGFA	132	22	13528	1.9619373605211043
GOTERM_BP_FAT	GO:0045596~negative regulation of cell differentiation	9	0.0011963127475580829	ZFP36, RTN4, NFKBIA, BCL6, JAG1, TCF7L2, TOB2, KLF4, TOB1	132	216	13528	1.964974859073354
GOTERM_BP_FAT	GO:0010628~positive regulation of gene expression	15	0.001489000306605398	CNBP, CEBPB, CCNH, NFKBIA, RHOQ, FOXO3, AFF1, TCF7L2, JUNB, ATF4, JUN, ETS2, VEGFA, KLF2, KLF4	132	581	13528	2.440166676174338
GOTERM_BP_FAT	GO:0043487~regulation of RNA stability	4	0.0015478209251631547	ZFP36, ZFP36L2, SERBP1, VEGFA	132	24	13528	2.5354031082098216
GOTERM_BP_FAT	GO:0051170~nuclear import	6	0.001625547489035283	CBLB, JUN, NFKBIA, BCL6, HNRNPA1, TOB1	132	88	13528	2.661116158513055
GOTERM_BP_FAT	GO:0010557~positive regulation of macromolecule biosynthetic process	16	0.0016432033214008285	IRS2, CNBP, CEBPB, CCNH, NFKBIA, RHOQ, AFF1, FOXO3, TCF7L2, JUNB, ATF4, JUN, ETS2, VEGFA, KLF2, KLF4	132	654	13528	2.6896510271969376
GOTERM_BP_FAT	GO:0045597~positive regulation of cell differentiation	9	0.0017332704086337194	ID2, BTG1, IL6ST, JUN, JUND, TGIF1, JAG1, FOXO3, JUNB	132	229	13528	2.835092682497453
GOTERM_BP_FAT	GO:0045892~negative regulation of transcription, DNA-dependent	11	0.0024171198614872475	SAP30, PA2G4, ID2, ARID5B, KLF11, TGIF1, BCL6, BHLHE40, SPEN, CSDA, KLF4	132	356	13528	3.932738099506039
GOTERM_BP_FAT	GO:0051270~regulation of cell motion	8	0.0027204654196870642	RTN4, IRS2, GTPBP4, IL6ST, VEGFA, BCL6, JAG1, PTEN	132	193	13528	4.415897344965591
GOTERM_BP_FAT	GO:0051253~negative regulation of RNA metabolic process	11	0.002726936224243195	SAP30, PA2G4, ID2, ARID5B, KLF11, TGIF1, BCL6, BHLHE40, SPEN, CSDA, KLF4	132	362	13528	4.426178921116309
GOTERM_BP_FAT	GO:0045935~positive regulation of nucleobase, nucleoside, nucleotide and nucleic acid metabolic process	15	0.0028754807915779817	CNBP, CEBPB, CCNH, NFKBIA, RHOQ, FOXO3, AFF1, TCF7L2, JUNB, ATF4, JUN, ETS2, VEGFA, KLF2, KLF4	132	624	13528	4.661918456337199
GOTERM_BP_FAT	GO:0009725~response to hormone stimulus	11	0.0030087792206992146	TXNIP, IRS2, GRB10, SOCS2, MAT2A, LDLR, ADM, FADS1, RHOQ, PTEN, JUNB	132	367	13528	4.8729971847726645
GOTERM_BP_FAT	GO:0001525~angiogenesis	7	0.0031577906838146253	RTN4, JUN, VEGFA, RHOB, JAG1, NCL, PTEN	132	148	13528	5.108437711918878
GOTERM_BP_FAT	GO:0010604~positive regulation of macromolecule metabolic process	18	0.003729928426588116	IRS2, CNBP, CEBPB, CCNH, IL6ST, NFKBIA, RHOQ, AFF1, FOXO3, TCF7L2, JUNB, CBLB, ATF4, JUN, ETS2, VEGFA, KLF2, KLF4	132	857	13528	6.007346933597423
GOTERM_BP_FAT	GO:0043434~response to peptide hormone stimulus	7	0.0038400865901777586	IRS2, GRB10, SOCS2, ADM, FADS1, RHOQ, JUNB	132	154	13528	6.179499739112126
GOTERM_BP_FAT	GO:0045639~positive regulation of myeloid cell differentiation	4	0.003915988463416911	ID2, JUN, JAG1, FOXO3	132	33	13528	6.297945095958324
GOTERM_BP_FAT	GO:0001709~cell fate determination	4	0.003915988463416911	MCL1, JAG1, IFRD1, KLF4	132	33	13528	6.297945095958324
GOTERM_BP_FAT	GO:0001953~negative regulation of cell-matrix adhesion	3	0.003980056960412086	ARHGAP6, BCL6, PTEN	132	10	13528	6.397815017491837
GOTERM_BP_FAT	GO:0000060~protein import into nucleus, translocation	4	0.004264863366224787	JUN, NFKBIA, BCL6, TOB1	132	34	13528	6.840561635419551
GOTERM_BP_FAT	GO:0010812~negative regulation of cell-substrate adhesion	3	0.004833770161589389	ARHGAP6, BCL6, PTEN	132	11	13528	7.71907226068802
GOTERM_BP_FAT	GO:0008593~regulation of Notch signaling pathway	3	0.004833770161589389	IL6ST, NFKBIA, JAG1	132	11	13528	7.71907226068802
GOTERM_BP_FAT	GO:0006915~apoptosis	14	0.0055707367437451815	RTN4, IER3, MCL1, KLF11, NFKBIA, RAF1, FOXO3, PTEN, BAG3, JUN, RHOB, HSPE1, HSPD1, GADD45A	132	602	13528	8.845531064444323
GOTERM_BP_FAT	GO:0045767~regulation of anti-apoptosis	4	0.00584588022961288	RTN4, ADM, IL6ST, SERBP1	132	38	13528	9.262767434901953
GOTERM_BP_FAT	GO:0009719~response to endogenous stimulus	11	0.005993502860246087	TXNIP, IRS2, GRB10, SOCS2, MAT2A, LDLR, ADM, FADS1, RHOQ, PTEN, JUNB	132	405	13528	9.485886713995551
GOTERM_BP_FAT	GO:0030334~regulation of cell migration	7	0.006019729309845895	RTN4, IRS2, GTPBP4, IL6ST, VEGFA, JAG1, PTEN	132	169	13528	9.525471830637688
GOTERM_BP_FAT	GO:0012501~programmed cell death	14	0.006288949326379262	RTN4, IER3, MCL1, KLF11, NFKBIA, RAF1, FOXO3, PTEN, BAG3, JUN, RHOB, HSPE1, HSPD1, GADD45A	132	611	13528	9.930881861674834
GOTERM_BP_FAT	GO:0032268~regulation of cellular protein metabolic process	12	0.006317593529543751	HSP90AB1, GTPBP4, PA2G4, EIF3B, IL6ST, JUN, MKNK2, NFKBIA, QKI, EIF1, SERPING1, EIF1B	132	474	13528	9.973915654864873
GOTERM_BP_FAT	GO:0008284~positive regulation of cell proliferation	11	0.006959495936701223	NAMPT, CNBP, IRS2, ID2, ADM, IL6ST, JUN, VEGFA, NAP1L1, TGIF1, BCL6	132	414	13528	10.933228875652867
GOTERM_BP_FAT	GO:0034097~response to cytokine stimulus	5	0.0072096856487771045	IL1R1, MCL1, IL6ST, JUN, JUNB	132	79	13528	11.304525245714292
GOTERM_BP_FAT	GO:0006457~protein folding	7	0.007496034973709228	HSP90AB1, HSP90AA1, BAG3, HSPE1, DNAJB1, HSPD1, HSPA9	132	177	13528	11.727699504262867
GOTERM_BP_FAT	GO:0042594~response to starvation	4	0.007735302231622226	ADM, FADS1, JUN, HSPA5	132	42	13528	12.079838991907765
GOTERM_BP_FAT	GO:0048511~rhythmic process	6	0.0080845239866402	MAT2A, JUN, VEGFA, ADAMTS1, FOXO3, NFIL3	132	128	13528	12.591434400726031
GOTERM_BP_FAT	GO:0007162~negative regulation of cell adhesion	4	0.008257427384965287	ARHGAP6, GTPBP4, BCL6, PTEN	132	43	13528	12.843694100997505
GOTERM_BP_FAT	GO:0033554~cellular response to stress	13	0.008807949783252389	CCNH, FADS1, FOXO3, ATF4, ADM, PRDX6, JUN, GPX3, BCL6, HSPA5, ABL1, GADD45A, REV3L	132	566	13528	13.642336915670105
GOTERM_BP_FAT	GO:0017038~protein import	6	0.00888872144999566	CBLB, JUN, NFKBIA, PEX5, BCL6, TOB1	132	131	13528	13.758932222522946
GOTERM_BP_FAT	GO:0006606~protein import into nucleus	5	0.009676958338995758	CBLB, JUN, NFKBIA, BCL6, TOB1	132	86	13528	14.889026527071413
GOTERM_BP_FAT	GO:0016071~mRNA metabolic process	10	0.009861932818623352	ZFP36, ZFP36L2, HNRNPH3, HNRNPK, SERBP1, VEGFA, SRRM1, QKI, HSPA1A, HSPA1B, HNRNPA1	132	370	13528	15.15220074405741
GOTERM_BP_FAT	GO:0006417~regulation of translation	6	0.010659876980854173	PA2G4, EIF3B, MKNK2, QKI, EIF1, EIF1B	132	137	13528	16.27874380024381
GOTERM_BP_FAT	GO:0045934~negative regulation of nucleobase, nucleoside, nucleotide and nucleic acid metabolic process	12	0.010933250996089263	SAP30, GTPBP4, PA2G4, ID2, ARID5B, KLF11, TGIF1, BCL6, BHLHE40, SPEN, CSDA, KLF4	132	512	13528	16.66145170683929
GOTERM_BP_FAT	GO:0040012~regulation of locomotion	7	0.01094259620765036	RTN4, IRS2, GTPBP4, IL6ST, VEGFA, JAG1, PTEN	132	192	13528	16.67450536113084
GOTERM_BP_FAT	GO:0010605~negative regulation of macromolecule metabolic process	15	0.011593360558961142	HSP90AB1, GTPBP4, ARID5B, KLF11, SERPING1, SPEN, CSDA, SAP30, PA2G4, ID2, JUN, TGIF1, BCL6, BHLHE40, KLF4	132	734	13528	17.578800805181782
GOTERM_BP_FAT	GO:0051172~negative regulation of nitrogen compound metabolic process	12	0.012011555293641873	SAP30, GTPBP4, PA2G4, ID2, ARID5B, KLF11, TGIF1, BCL6, BHLHE40, SPEN, CSDA, KLF4	132	519	13528	18.155043875923383
GOTERM_BP_FAT	GO:0031667~response to nutrient levels	7	0.012306813316512016	ADM, IL6ST, FADS1, JUN, HSPA5, PTEN, KLF4	132	197	13528	18.559606431016284
GOTERM_BP_FAT	GO:0034504~protein localization in nucleus	5	0.013101904083837781	CBLB, JUN, NFKBIA, BCL6, TOB1	132	94	13528	19.63971647595595
GOTERM_BP_FAT	GO:0016481~negative regulation of transcription	11	0.013725865579729005	SAP30, PA2G4, ID2, ARID5B, KLF11, TGIF1, BCL6, BHLHE40, SPEN, CSDA, KLF4	132	459	13528	20.477909463163723
GOTERM_BP_FAT	GO:0042592~homeostatic process	15	0.013939446385404062	IRS2, MCL1, LDLR, IL6ST, FOXO3, TCF7L2, ADM, ID2, PRDX6, JUN, MT2A, VEGFA, QKI, BCL6, GLRX	132	751	13528	20.762928942577553
GOTERM_BP_FAT	GO:0045445~myoblast differentiation	3	0.014287867757435806	JAG1, IFRD1, TCF7L2	132	19	13528	21.225831186948618
GOTERM_BP_FAT	GO:0051726~regulation of cell cycle	9	0.01519893297438558	GTPBP4, ID2, JUN, PIM1, RHOB, BCL6, GADD45A, PTEN, JUNB	132	331	13528	22.424264482169388
GOTERM_BP_FAT	GO:0000079~regulation of cyclin-dependent protein kinase activity	4	0.015369459378065574	GTPBP4, PIM1, GADD45A, PTEN	132	54	13528	22.64666610277073
GOTERM_BP_FAT	GO:0032868~response to insulin stimulus	5	0.016121034344579316	IRS2, GRB10, ADM, FADS1, RHOQ	132	100	13528	23.61975463054674
GOTERM_BP_FAT	GO:0042542~response to hydrogen peroxide	4	0.016938838960904524	TXNIP, PRDX6, JUN, GPX3	132	56	13528	24.665519154431557
GOTERM_BP_FAT	GO:0010558~negative regulation of macromolecule biosynthetic process	12	0.017157576446247172	SAP30, GTPBP4, PA2G4, ID2, ARID5B, KLF11, TGIF1, BCL6, BHLHE40, SPEN, CSDA, KLF4	132	547	13528	24.942939636950044
GOTERM_BP_FAT	GO:0006605~protein targeting	7	0.018209017548570464	CBLB, JUN, NFKBIA, PEX5, BCL6, TOB1, HSPA9	132	215	13528	26.263115932989468
GOTERM_BP_FAT	GO:0051100~negative regulation of binding	4	0.019455175623165347	GTPBP4, ID2, PIM1, NFKBIA	132	59	13528	27.799518153866188
GOTERM_BP_FAT	GO:0048609~reproductive process in a multicellular organism	11	0.01991549152398335	AGFG1, RGS2, DIAPH2, VEGFA, QKI, BCL6, ADAMTS1, FOXO3, CSDA, TOB2, JUNB	132	487	13528	28.35939929873946
GOTERM_BP_FAT	GO:0032504~multicellular organism reproduction	11	0.01991549152398335	AGFG1, RGS2, DIAPH2, VEGFA, QKI, BCL6, ADAMTS1, FOXO3, CSDA, TOB2, JUNB	132	487	13528	28.35939929873946
GOTERM_BP_FAT	GO:0009991~response to extracellular stimulus	7	0.020142719529822085	ADM, IL6ST, FADS1, JUN, HSPA5, PTEN, KLF4	132	220	13528	28.63426972684593
GOTERM_BP_FAT	GO:0031327~negative regulation of cellular biosynthetic process	12	0.020280129945395662	SAP30, GTPBP4, PA2G4, ID2, ARID5B, KLF11, TGIF1, BCL6, BHLHE40, SPEN, CSDA, KLF4	132	561	13528	28.800009526090054
GOTERM_BP_FAT	GO:0051168~nuclear export	4	0.020337371542311657	AGFG1, NXF1, HNRNPA1, HSPA9	132	60	13528	28.86894562821649
GOTERM_BP_FAT	GO:0008219~cell death	14	0.022031415685594774	RTN4, IER3, MCL1, KLF11, NFKBIA, RAF1, FOXO3, PTEN, BAG3, JUN, RHOB, HSPE1, HSPD1, GADD45A	132	719	13528	30.88091817515194
GOTERM_BP_FAT	GO:0007568~aging	5	0.02205863877704774	SOCS2, ADM, FADS1, JUN, PTEN	132	110	13528	30.912809380670016
GOTERM_BP_FAT	GO:0016265~death	14	0.023163328552669695	RTN4, IER3, MCL1, KLF11, NFKBIA, RAF1, FOXO3, PTEN, BAG3, JUN, RHOB, HSPE1, HSPD1, GADD45A	132	724	13528	32.1953244325037
GOTERM_BP_FAT	GO:0009890~negative regulation of biosynthetic process	12	0.02327693055290812	SAP30, GTPBP4, PA2G4, ID2, ARID5B, KLF11, TGIF1, BCL6, BHLHE40, SPEN, CSDA, KLF4	132	573	13528	32.325936978440176
GOTERM_BP_FAT	GO:0010629~negative regulation of gene expression	11	0.024557076701463086	SAP30, PA2G4, ID2, ARID5B, KLF11, TGIF1, BCL6, BHLHE40, SPEN, CSDA, KLF4	132	504	13528	33.781519255552126
GOTERM_BP_FAT	GO:0007292~female gamete generation	4	0.025074694484241062	DIAPH2, ADAMTS1, FOXO3, TOB2	132	65	13528	34.36167811085037
GOTERM_BP_FAT	GO:0046907~intracellular transport	13	0.02555786541271352	HSP90AA1, AGFG1, PEX5, NFKBIA, NXF1, HNRNPA1, CBLB, JUN, RHOB, BCL6, TOB1, RHOBTB3, HSPA9	132	657	13528	34.89891492617965
GOTERM_BP_FAT	GO:0007010~cytoskeleton organization	10	0.02585356761033556	RND3, ARHGAP6, AGFG1, DIAPH2, SUN2, RAF1, RHOQ, BCL6, ABL1, GADD45A	132	436	13528	35.225664522017674
GOTERM_BP_FAT	GO:0008283~cell proliferation	10	0.02585356761033556	ZFP36L2, IRS2, PA2G4, VEGFA, PIM1, RAF1, HSPD1, PTEN, TCF7L2, EMP1	132	436	13528	35.225664522017674
GOTERM_BP_FAT	GO:0001952~regulation of cell-matrix adhesion	3	0.02789088376034546	ARHGAP6, BCL6, PTEN	132	27	13528	37.435353263743764
GOTERM_BP_FAT	GO:0002684~positive regulation of immune system process	7	0.02825276802814919	CBLB, IL6ST, VEGFA, NFKBIA, BCL6, SERPING1, HSPD1	132	238	13528	37.82036981117704
GOTERM_BP_FAT	GO:0010761~fibroblast migration	2	0.028772554428481055	ZFAND5, ARID5B	132	3	13528	38.36948791273345
GOTERM_BP_FAT	GO:0042692~muscle cell differentiation	5	0.029955797813229174	SEMA4C, QKI, JAG1, IFRD1, TCF7L2	132	121	13528	39.60255579526986
GOTERM_BP_FAT	GO:0014070~response to organic cyclic substance	5	0.029955797813229174	PLIN2, FADS1, JUN, PTEN, JUNB	132	121	13528	39.60255579526986
GOTERM_BP_FAT	GO:0045638~negative regulation of myeloid cell differentiation	3	0.03392334917429822	ZFP36, NFKBIA, TOB2	132	30	13528	43.57010874436988
GOTERM_BP_FAT	GO:0000302~response to reactive oxygen species	4	0.036174650228228716	TXNIP, PRDX6, JUN, GPX3	132	75	13528	45.71112620849287
GOTERM_BP_FAT	GO:0050727~regulation of inflammatory response	4	0.037402610776031894	ZFP36, IL6ST, BCL6, SERPING1	132	76	13528	46.846520807059925
GOTERM_BP_FAT	GO:0007276~gamete generation	9	0.03819430220574511	AGFG1, RGS2, DIAPH2, QKI, BCL6, ADAMTS1, FOXO3, CSDA, TOB2	132	395	13528	47.56666173151305
GOTERM_BP_FAT	GO:0009267~cellular response to starvation	3	0.03820071273623675	FADS1, JUN, HSPA5	132	32	13528	47.57245530058829
GOTERM_BP_FAT	GO:0048545~response to steroid hormone stimulus	6	0.03886475973908532	TXNIP, SOCS2, LDLR, ADM, PTEN, JUNB	132	192	13528	48.169345458825944
GOTERM_BP_FAT	GO:0030278~regulation of ossification	4	0.03992201438553959	IL6ST, JUND, TOB2, TOB1	132	78	13528	49.106517093537846
GOTERM_BP_FAT	GO:0032870~cellular response to hormone stimulus	5	0.04025671125629202	IRS2, GRB10, SOCS2, RHOQ, JUNB	132	133	13528	49.39986499386858
GOTERM_BP_FAT	GO:0046324~regulation of glucose import	3	0.04041263043045542	IRS2, GRB10, RHOQ	132	33	13528	49.53597850042786
GOTERM_BP_FAT	GO:0003006~reproductive developmental process	7	0.042065933332820465	AGFG1, VEGFA, ADAMTS1, FOXO3, CSDA, TCF7L2, JUNB	132	262	13528	50.95825999784955
GOTERM_BP_FAT	GO:0010827~regulation of glucose transport	3	0.042671865871763026	IRS2, GRB10, RHOQ	132	34	13528	51.47002503321261
GOTERM_BP_FAT	GO:0030855~epithelial cell differentiation	5	0.04408615954524436	TXNIP, JUN, VEGFA, JAG1, EMP1	132	137	13528	52.64506570813299
GOTERM_BP_FAT	GO:0045165~cell fate commitment	5	0.04607521293450057	MCL1, JAG1, IFRD1, TCF7L2, KLF4	132	139	13528	54.25246062842156
GOTERM_BP_FAT	GO:0000288~nuclear-transcribed mRNA catabolic process, deadenylation-dependent decay	2	0.047496294136246744	ZFP36, ZFP36L2	132	5	13528	55.36931044240836
GOTERM_BP_FAT	GO:0048625~myoblast cell fate commitment	2	0.047496294136246744	IFRD1, TCF7L2	132	5	13528	55.36931044240836
GOTERM_BP_FAT	GO:0042026~protein refolding	2	0.047496294136246744	HSP90AA1, HSPD1	132	5	13528	55.36931044240836
GOTERM_BP_FAT	GO:0051895~negative regulation of focal adhesion formation	2	0.047496294136246744	ARHGAP6, PTEN	132	5	13528	55.36931044240836
GOTERM_BP_FAT	GO:0010035~response to inorganic substance	6	0.04909185092242768	TXNIP, PRDX6, JUN, GPX3, PTEN, MT1X	132	205	13528	56.592732199268326
GOTERM_BP_FAT	GO:0051129~negative regulation of cellular component organization	5	0.04915156331587955	RTN4, ARHGAP6, RHOQ, MID1IP1, PTEN	132	142	13528	56.63790016661533
GOTERM_BP_FAT	GO:0008286~insulin receptor signaling pathway	3	0.049722478195220896	IRS2, GRB10, RHOQ	132	37	13528	57.067530526605495
GOTERM_BP_FAT	GO:0007266~Rho protein signal transduction	3	0.05216006697134943	ARHGAP6, RHOB, CDC42EP4	132	38	13528	58.85728886561704
GOTERM_BP_FAT	GO:0051028~mRNA transport	4	0.052288560983471455	AGFG1, QKI, NXF1, HNRNPA1	132	87	13528	58.949660122622404
GOTERM_BP_FAT	GO:0033365~protein localization in organelle	5	0.053426036978415754	CBLB, JUN, NFKBIA, BCL6, TOB1	132	146	13528	59.75890862830905
GOTERM_BP_FAT	GO:0042493~response to drug	6	0.05887817173643495	TXNIP, MAT2A, PLIN2, JUN, PTEN, JUNB	132	216	13528	63.433933876665606
GOTERM_BP_FAT	GO:0007548~sex differentiation	5	0.05904505195645622	VEGFA, ADAMTS1, FOXO3, CSDA, TCF7L2	132	151	13528	63.54128141864486
GOTERM_BP_FAT	GO:0002761~regulation of myeloid leukocyte differentiation	3	0.059720387632422156	ID2, JUN, TOB2	132	41	13528	63.97268186776437
GOTERM_BP_FAT	GO:0001570~vasculogenesis	3	0.059720387632422156	VEGFA, QKI, JUNB	132	41	13528	63.97268186776437
GOTERM_BP_FAT	GO:0006446~regulation of translational initiation	3	0.059720387632422156	EIF3B, EIF1, EIF1B	132	41	13528	63.97268186776437
GOTERM_BP_FAT	GO:0006405~RNA export from nucleus	3	0.059720387632422156	AGFG1, NXF1, HNRNPA1	132	41	13528	63.97268186776437
GOTERM_BP_FAT	GO:0048878~chemical homeostasis	10	0.06074088565663141	IRS2, LDLR, ADM, IL6ST, JUN, MT2A, VEGFA, QKI, FOXO3, TCF7L2	132	512	13528	64.61547913677497
GOTERM_BP_FAT	GO:0031647~regulation of protein stability	3	0.062319641901941836	GTPBP4, HSPD1, PTEN	132	42	13528	65.58872072651548
GOTERM_BP_FAT	GO:0051591~response to cAMP	3	0.062319641901941836	MAT2A, JUN, JUNB	132	42	13528	65.58872072651548
GOTERM_BP_FAT	GO:0030218~erythrocyte differentiation	3	0.06495682309823961	ID2, VEGFA, BCL6	132	43	13528	67.15854924920517
GOTERM_BP_FAT	GO:0006402~mRNA catabolic process	3	0.06495682309823961	ZFP36, ZFP36L2, HSPA1A, HSPA1B	132	43	13528	67.15854924920517
GOTERM_BP_FAT	GO:0045667~regulation of osteoblast differentiation	3	0.06495682309823961	IL6ST, JUND, TOB1	132	43	13528	67.15854924920517
GOTERM_BP_FAT	GO:0051131~chaperone-mediated protein complex assembly	2	0.06586177221599351	HSP90AA1, HSPD1	132	7	13528	67.68154536665004
GOTERM_BP_FAT	GO:0031669~cellular response to nutrient levels	3	0.06763096590009596	FADS1, JUN, HSPA5	132	44	13528	68.68148588586743
GOTERM_BP_FAT	GO:0050658~RNA transport	4	0.06792908867091944	AGFG1, QKI, NXF1, HNRNPA1	132	97	13528	68.84709404041546
GOTERM_BP_FAT	GO:0051236~establishment of RNA localization	4	0.06792908867091944	AGFG1, QKI, NXF1, HNRNPA1	132	97	13528	68.84709404041546
GOTERM_BP_FAT	GO:0050657~nucleic acid transport	4	0.06792908867091944	AGFG1, QKI, NXF1, HNRNPA1	132	97	13528	68.84709404041546
GOTERM_BP_FAT	GO:0032101~regulation of response to external stimulus	5	0.0686656553190648	ZFP36, IL6ST, VEGFA, BCL6, SERPING1	132	159	13528	69.25273795988241
GOTERM_BP_FAT	GO:0030036~actin cytoskeleton organization	6	0.06867756282719806	RND3, ARHGAP6, DIAPH2, RHOQ, BCL6, ABL1	132	226	13528	69.25925474001859
GOTERM_BP_FAT	GO:0051272~positive regulation of cell motion	4	0.0695983084217562	IRS2, IL6ST, VEGFA, BCL6	132	98	13528	69.75925161034291
GOTERM_BP_FAT	GO:0060429~epithelium development	6	0.06970456886889997	TXNIP, JUN, VEGFA, TGIF1, JAG1, EMP1	132	227	13528	69.81646029586773
GOTERM_BP_FAT	GO:0043433~negative regulation of transcription factor activity	3	0.07034111986916877	ID2, PIM1, NFKBIA	132	45	13528	70.1570440110715
GOTERM_BP_FAT	GO:0006413~translational initiation	3	0.07034111986916877	EIF3B, EIF1, EIF1B	132	45	13528	70.1570440110715
GOTERM_BP_FAT	GO:0006403~RNA localization	4	0.07299219788145458	AGFG1, QKI, NXF1, HNRNPA1	132	100	13528	71.53703114345275
GOTERM_BP_FAT	GO:0048585~negative regulation of response to stimulus	4	0.07299219788145458	ZFP36, GRB10, BCL6, SERPING1	132	100	13528	71.53703114345275
GOTERM_BP_FAT	GO:0048660~regulation of smooth muscle cell proliferation	3	0.07308634925590218	JUN, VEGFA, KLF4	132	46	13528	71.58492000636217
GOTERM_BP_FAT	GO:0010810~regulation of cell-substrate adhesion	3	0.07308634925590218	ARHGAP6, BCL6, PTEN	132	46	13528	71.58492000636217
GOTERM_BP_FAT	GO:0051893~regulation of focal adhesion formation	2	0.07491229420824819	ARHGAP6, PTEN	132	8	13528	72.4988239120083
GOTERM_BP_FAT	GO:0007184~SMAD protein nuclear translocation	2	0.07491229420824819	JUN, TOB1	132	8	13528	72.4988239120083
GOTERM_BP_FAT	GO:0019953~sexual reproduction	9	0.07684333296590914	AGFG1, RGS2, DIAPH2, QKI, BCL6, ADAMTS1, FOXO3, CSDA, TOB2	132	458	13528	73.43523531118194
GOTERM_BP_FAT	GO:0006366~transcription from RNA polymerase II promoter	6	0.07713138863404378	CEBPB, CEBPD, CCNH, KLF11, CEBPZ, NFIL3	132	234	13528	73.57232548581332
GOTERM_BP_FAT	GO:0048584~positive regulation of response to stimulus	6	0.0793293285889313	IL6ST, VEGFA, SEMA4C, NFKBIA, SERPING1, HSPD1	132	236	13528	74.59668217267294
GOTERM_BP_FAT	GO:0034101~erythrocyte homeostasis	3	0.0815233487624548	ID2, VEGFA, BCL6	132	49	13528	75.58191358269994
GOTERM_BP_FAT	GO:0007265~Ras protein signal transduction	4	0.08179302596587876	ARHGAP6, RAF1, RHOB, CDC42EP4	132	105	13528	75.70050393500829
GOTERM_BP_FAT	GO:0043627~response to estrogen stimulus	4	0.08179302596587876	TXNIP, SOCS2, LDLR, PTEN	132	105	13528	75.70050393500829
GOTERM_BP_FAT	GO:0030029~actin filament-based process	6	0.08497053516388281	RND3, ARHGAP6, DIAPH2, RHOQ, BCL6, ABL1	132	241	13528	77.05766253251251
GOTERM_BP_FAT	GO:0043392~negative regulation of DNA binding	3	0.08730688051010195	ID2, PIM1, NFKBIA	132	51	13528	78.00975251065924
GOTERM_BP_FAT	GO:0045444~fat cell differentiation	3	0.09320946090661836	CEBPB, RGS2, TCF7L2	132	53	13528	80.2524021392211
GOTERM_BP_FAT	GO:0008406~gonad development	4	0.09484057612230282	VEGFA, ADAMTS1, FOXO3, CSDA	132	112	13528	80.83312914432602
GOTERM_BP_FAT	GO:0045088~regulation of innate immune response	3	0.09620330711984428	NFKBIA, SERPING1, HSPD1	132	54	13528	81.30595941607866
GOTERM_BP_FAT	GO:0032355~response to estradiol stimulus	3	0.09620330711984428	TXNIP, SOCS2, PTEN	132	54	13528	81.30595941607866
GOTERM_BP_FAT	GO:0008360~regulation of cell shape	3	0.09620330711984428	VEGFA, RHOQ, CDC42EP4	132	54	13528	81.30595941607866
GOTERM_BP_FAT	GO:0015931~nucleobase, nucleoside, nucleotide and nucleic acid transport	4	0.09677073391641408	AGFG1, QKI, NXF1, HNRNPA1	132	113	13528	81.49959014932037

## Sheet: CG High MF
Category	Term	Count	p value	Genes	List Total	Pop Hits	Pop Total	BH-adjusted p value
GOTERM_MF_FAT	GO:0003677~DNA binding	45	1.3876812862790113E-6	ZFAND5, CNBP, NACA, AGFG1, TAF1D, PHF20, FOXO3, TCF7L2, ZNF331, ZFP36L2, HNRNPK, DDX3X, JUND, CEBPZ, SRRM1, CHD1, BCL6, ZNF395, BHLHE40, NFIL3, ZFP36, CEBPB, KLF9, CEBPD, ARID5B, KLF11, AFF1, SPEN, CSDA, HNRNPA1, NCL, JUNB, RLF, HNRPDL, PA2G4, ATF4, JUN, ETS2, TGIF1, H3F3B, HSPD1, ABL1, KLF2, KLF4, REV3L	123	2331	12983	0.0018447567673995913
GOTERM_MF_FAT	GO:0043566~structure-specific DNA binding	10	8.81152031965191E-6	HNRPDL, CNBP, JUN, BCL6, SPEN, HSPD1, CSDA, HNRNPA1, KLF4, JUNB	123	145	12983	0.011713330817808565
GOTERM_MF_FAT	GO:0003700~transcription factor activity	24	3.3273143959220824E-5	CNBP, CEBPB, KLF9, CEBPD, KLF11, AFF1, FOXO3, SPEN, CSDA, TCF7L2, JUNB, RLF, ZFP36L2, ATF4, PA2G4, JUN, ETS2, JUND, TGIF1, BCL6, BHLHE40, KLF2, NFIL3, KLF4	123	975	12983	0.04422400806051163
GOTERM_MF_FAT	GO:0016564~transcription repressor activity	13	4.158467455206887E-5	ARID5B, SPEN, CSDA, TCF7L2, JUNB, SAP30, ID2, TGIF1, BCL6, BHLHE40, NFIL3, KLF4, TOB1	123	316	12983	0.055268207726455465
GOTERM_MF_FAT	GO:0051082~unfolded protein binding	8	1.0308193864035526E-4	HSP90AB1, HSP90AA1, HSPE1, HSPA1A, DNAJB1, HSPA5, HSPD1, HSPA1B, HSPA9	123	115	12983	0.1369495141183008
GOTERM_MF_FAT	GO:0030528~transcription regulator activity	30	1.2245408216294233E-4	CNBP, FOXO3, TCF7L2, SAP30, ZFP36L2, JUND, BCL6, BHLHE40, NFIL3, CEBPB, KLF9, CEBPD, ARID5B, KLF11, SPEN, AFF1, MED13L, CSDA, JUNB, RLF, ATF4, PA2G4, ID2, BTG1, JUN, ETS2, TGIF1, KLF2, KLF4, TOB1	123	1512	12983	0.16266700776054188
GOTERM_MF_FAT	GO:0003697~single-stranded DNA binding	6	1.612568041107335E-4	HNRPDL, CNBP, SPEN, HSPD1, CSDA, HNRNPA1	123	55	12983	0.21416115077925735
GOTERM_MF_FAT	GO:0008134~transcription factor binding	15	3.221142246860355E-4	PIM1, NFKBIA, SPEN, CSDA, TCF7L2, JUNB, SAP30, BTG1, UBA2, JUN, GPX3, TGIF1, NFIL3, TOB2, TOB1	123	513	12983	0.4273692466599477
GOTERM_MF_FAT	GO:0003723~RNA binding	18	3.8428032396329583E-4	ZFP36, CNBP, AGFG1, SPEN, NXF1, HNRNPA1, NCL, HNRPDL, ZFP36L2, HNRNPH3, PA2G4, HNRNPK, EIF3B, DDX3X, SERBP1, EIF4A1, SRRM1, QKI	123	718	12983	0.5096542317671426
GOTERM_MF_FAT	GO:0003727~single-stranded RNA binding	4	0.0020083920841505896	ZFP36, HNRPDL, CNBP, HNRNPA1	123	27	12983	2.6372266864488014
GOTERM_MF_FAT	GO:0003702~RNA polymerase II transcription factor activity	9	0.0021216207159556752	ATF4, CEBPB, JUN, JUND, MED13L, CSDA, TCF7L2, KLF4, JUNB	123	244	12983	2.7839748018795962
GOTERM_MF_FAT	GO:0003714~transcription corepressor activity	7	0.00244735258886876	SAP30, TGIF1, SPEN, CSDA, NFIL3, JUNB, TOB1	123	145	12983	3.204994451954124
GOTERM_MF_FAT	GO:0003729~mRNA binding	5	0.003414314187241245	ZFP36, HNRPDL, SERBP1, EIF4A1, NXF1	123	66	12983	4.44491382701745
GOTERM_MF_FAT	GO:0005161~platelet-derived growth factor receptor binding	3	0.004557199944469161	IL1R1, VEGFA, PTEN	123	11	12983	5.891472351110593
GOTERM_MF_FAT	GO:0043565~sequence-specific DNA binding	14	0.00458516006340281	CEBPB, CEBPD, FOXO3, NCL, JUNB, ATF4, ETS2, JUN, JUND, TGIF1, BCL6, HSPD1, NFIL3, KLF4	123	607	12983	5.9266065282272855
GOTERM_MF_FAT	GO:0000166~nucleotide binding	33	0.00834466747984902	HSP90AB1, MKNK2, RHOQ, HSPA1A, HSPA1B, EIF3B, DDX3X, MAP3K8, CHD1, RHOB, HSPE1, HSPA5, HSPA9, RHOBTB3, GTPBP4, HSP90AA1, MAT2A, STK24, PIM1, RAF1, EEF2, SPEN, NXF1, HNRNPA1, NCL, HNRPDL, RND3, HNRNPH3, NOLC1, UBA2, EIF4A1, HSPD1, ABL1, REV3L	123	2245	12983	10.541807267062042
GOTERM_MF_FAT	GO:0005070~SH3/SH2 adaptor activity	4	0.010892559257787163	ARHGAP6, GRB10, SOCS2, TOB1	123	49	12983	13.549590851201021
GOTERM_MF_FAT	GO:0030674~protein binding, bridging	5	0.011824123694008683	ARHGAP6, GRB10, SOCS2, HSPA5, TOB1	123	94	12983	14.625751048356417
GOTERM_MF_FAT	GO:0003690~double-stranded DNA binding	5	0.013150586466373734	HNRPDL, JUN, CSDA, KLF4, JUNB	123	97	12983	16.13673776080704
GOTERM_MF_FAT	GO:0008135~translation factor activity, nucleic acid binding	5	0.013612957190337331	EIF3B, EIF4A1, EIF1, EEF2, EIF1B	123	98	12983	16.65758923045617
GOTERM_MF_FAT	GO:0003743~translation initiation factor activity	4	0.019622447102701984	EIF3B, EIF4A1, EIF1, EIF1B	123	61	12983	23.160594581310235
GOTERM_MF_FAT	GO:0060090~molecular adaptor activity	4	0.0250863443855648	ARHGAP6, GRB10, SOCS2, TOB1	123	67	12983	28.66265853087332
GOTERM_MF_FAT	GO:0030911~TPR domain binding	2	0.02792876631141445	HSP90AB1, HSP90AA1	123	3	12983	31.378627336653487
GOTERM_MF_FAT	GO:0046983~protein dimerization activity	11	0.0314533051806202	ATF4, CEBPB, HSP90AA1, MCL1, CEBPD, IL6ST, JUN, VEGFA, JUND, NFIL3, JUNB	123	542	12983	34.61353324897196
GOTERM_MF_FAT	GO:0019904~protein domain specific binding	8	0.036560758986089875	SH3BP5, HSP90AB1, IRS2, ARHGAP6, HSP90AA1, RHOQ, QKI, PTEN	123	331	12983	39.05165163031706
GOTERM_MF_FAT	GO:0008022~protein C-terminus binding	5	0.04387480182160064	ATF4, PEX5, MID1IP1, ABL1, NCL	123	141	12983	44.92369246002483
GOTERM_MF_FAT	GO:0030235~nitric-oxide synthase regulator activity	2	0.046116730159504585	HSP90AB1, HSP90AA1	123	5	12983	46.61598470589479
GOTERM_MF_FAT	GO:0003712~transcription cofactor activity	8	0.05513542236389696	SAP30, BTG1, TGIF1, SPEN, CSDA, NFIL3, JUNB, TOB1	123	363	12983	52.94941933708219
GOTERM_MF_FAT	GO:0032553~ribonucleotide binding	25	0.05603978836903306	HSP90AB1, MKNK2, RHOQ, HSPA1A, HSPA1B, DDX3X, MAP3K8, CHD1, RHOB, HSPE1, HSPA5, RHOBTB3, HSPA9, GTPBP4, HSP90AA1, MAT2A, STK24, PIM1, RAF1, EEF2, RND3, NOLC1, UBA2, EIF4A1, HSPD1, ABL1	123	1836	12983	53.544586906482635
GOTERM_MF_FAT	GO:0032555~purine ribonucleotide binding	25	0.05603978836903306	HSP90AB1, MKNK2, RHOQ, HSPA1A, HSPA1B, DDX3X, MAP3K8, CHD1, RHOB, HSPE1, HSPA5, RHOBTB3, HSPA9, GTPBP4, HSP90AA1, MAT2A, STK24, PIM1, RAF1, EEF2, RND3, NOLC1, UBA2, EIF4A1, HSPD1, ABL1	123	1836	12983	53.544586906482635
GOTERM_MF_FAT	GO:0019899~enzyme binding	10	0.05786525149551642	IRS2, ARHGAP6, PA2G4, BTG1, DIAPH2, NFKBIA, FOXO3, CDC42EP4, TCF7L2, RHOBTB3	123	523	12983	54.72478023700267
GOTERM_MF_FAT	GO:0050811~GABA receptor binding	2	0.07276768090455378	GABARAPL1, ATF4	123	8	12983	63.37249576784658
GOTERM_MF_FAT	GO:0017076~purine nucleotide binding	25	0.08374182373520209	HSP90AB1, MKNK2, RHOQ, HSPA1A, HSPA1B, DDX3X, MAP3K8, CHD1, RHOB, HSPE1, HSPA5, RHOBTB3, HSPA9, GTPBP4, HSP90AA1, MAT2A, STK24, PIM1, RAF1, EEF2, RND3, NOLC1, UBA2, EIF4A1, HSPD1, ABL1	123	1918	12983	68.7342765154201
GOTERM_MF_FAT	GO:0046870~cadmium ion binding	2	0.09012333931404358	MT1E, MT1X	123	10	12983	71.50839340380438
GOTERM_MF_FAT	GO:0016563~transcription activator activity	8	0.09158766758371911	ATF4, CEBPB, AFF1, SPEN, FOXO3, KLF2, KLF4, JUNB	123	410	12983	72.1119727560196
GOTERM_MF_FAT	GO:0005524~ATP binding	20	0.09641993631348555	HSP90AB1, HSP90AA1, MAT2A, STK24, PIM1, MKNK2, RAF1, HSPA1A, HSPA1B, NOLC1, DDX3X, UBA2, MAP3K8, EIF4A1, CHD1, HSPE1, HSPA5, HSPD1, ABL1, HSPA9, RHOBTB3	123	1477	12983	74.02090577527322
GOTERM_MF_FAT	GO:0004602~glutathione peroxidase activity	2	0.09867995325151761	PRDX6, GPX3	123	11	12983	74.87156691467716

## Sheet: CG High KEGG
Category	Term	Count	p value	Genes	List Total	Pop Hits	Pop Total	BH-adjusted p value
KEGG_PATHWAY	hsa05215:Prostate cancer	7	2.877688409028474E-4	HSP90AB1, ATF4, HSP90AA1, NFKBIA, RAF1, PTEN, TCF7L2	54	89	5085	0.3112587749928508
KEGG_PATHWAY	hsa04722:Neurotrophin signaling pathway	7	0.0016740426343475824	IRS2, ATF4, JUN, NFKBIA, RAF1, FOXO3, ABL1	54	124	5085	1.7984054913691594
KEGG_PATHWAY	hsa04010:MAPK signaling pathway	9	0.005874450908342767	IL1R1, ATF4, JUN, MAP3K8, JUND, MKNK2, RAF1, HSPA1A, HSPA1B, GADD45A	54	267	5085	6.182357211217426
KEGG_PATHWAY	hsa05200:Pathways in cancer	10	0.006138006148994655	HSP90AB1, CBLB, HSP90AA1, JUN, VEGFA, NFKBIA, RAF1, ABL1, PTEN, TCF7L2	54	328	5085	6.451412250166633
KEGG_PATHWAY	hsa04910:Insulin signaling pathway	6	0.012659251738669646	IRS2, CBLB, SOCS2, MKNK2, RAF1, RHOQ	54	135	5085	12.889704313226936
KEGG_PATHWAY	hsa05213:Endometrial cancer	4	0.01649566189887839	RAF1, FOXO3, PTEN, TCF7L2	54	52	5085	16.48670019263243
KEGG_PATHWAY	hsa04660:T cell receptor signaling pathway	5	0.02540001262289103	CBLB, JUN, MAP3K8, NFKBIA, RAF1	54	108	5085	24.32155665853617
KEGG_PATHWAY	hsa05220:Chronic myeloid leukemia	4	0.04267042963173908	CBLB, NFKBIA, RAF1, ABL1	54	75	5085	37.6458019810048
KEGG_PATHWAY	hsa04612:Antigen processing and presentation	4	0.054815344069691005	HSP90AB1, HSP90AA1, HSPA1A, HSPA5, HSPA1B	54	83	5085	45.699154478165546
KEGG_PATHWAY	hsa04012:ErbB signaling pathway	4	0.06144722299457349	CBLB, JUN, RAF1, ABL1	54	87	5085	49.68656236654378

## Sheet: CG Low BP
Category	Term	Count	p value	Genes	List Total	Pop Hits	Pop Total	BH-adjusted p value
GOTERM_BP_FAT	GO:0002504~antigen processing and presentation of peptide or polysaccharide antigen via MHC class II	6	5.881224692572087E-7	IFI30, HLA-DPA1, HLA-DMB, HLA-DMA, HLA-DQA1, HLA-DRA	69	33	13528	9.075598085162007E-4
GOTERM_BP_FAT	GO:0008064~regulation of actin polymerization or depolymerization	6	1.3223817742649676E-5	ACTR3, CAPG, ARPC5, CAPZB, CXCL12, RASA1	69	61	13528	0.02040444285772436
GOTERM_BP_FAT	GO:0030832~regulation of actin filament length	6	1.5503058650436115E-5	ACTR3, CAPG, ARPC5, CAPZB, CXCL12, RASA1	69	63	13528	0.02392093404081086
GOTERM_BP_FAT	GO:0019882~antigen processing and presentation	6	5.926226275909259E-5	IFI30, HLA-DPA1, HLA-DMB, HLA-DMA, HLA-DQA1, HLA-DRA	69	83	13528	0.09141171373124868
GOTERM_BP_FAT	GO:0032956~regulation of actin cytoskeleton organization	6	8.277527281107933E-5	ACTR3, CAPG, ARPC5, CAPZB, CXCL12, RASA1	69	89	13528	0.1276587438451826
GOTERM_BP_FAT	GO:0032970~regulation of actin filament-based process	6	9.693722999827518E-5	ACTR3, CAPG, ARPC5, CAPZB, CXCL12, RASA1	69	92	13528	0.14948450512822786
GOTERM_BP_FAT	GO:0030833~regulation of actin filament polymerization	5	1.5281552249602674E-4	ACTR3, CAPG, ARPC5, CAPZB, RASA1	69	54	13528	0.23555806142576685
GOTERM_BP_FAT	GO:0032271~regulation of protein polymerization	5	3.7328094105762677E-4	ACTR3, CAPG, ARPC5, CAPZB, RASA1	69	68	13528	0.5744811002765915
GOTERM_BP_FAT	GO:0051493~regulation of cytoskeleton organization	6	5.984935537145438E-4	ACTR3, CAPG, ARPC5, CAPZB, CXCL12, RASA1	69	136	13528	0.9195899970366184
GOTERM_BP_FAT	GO:0002495~antigen processing and presentation of peptide antigen via MHC class II	3	6.836342410796369E-4	IFI30, HLA-DMA, HLA-DRA	69	8	13528	1.0497649177802382
GOTERM_BP_FAT	GO:0019886~antigen processing and presentation of exogenous peptide antigen via MHC class II	3	6.836342410796369E-4	IFI30, HLA-DMA, HLA-DRA	69	8	13528	1.0497649177802382
GOTERM_BP_FAT	GO:0033043~regulation of organelle organization	7	7.600297285898994E-4	ACTR3, CAPG, CDC16, ARPC5, CAPZB, CXCL12, RASA1	69	217	13528	1.1664327985785539
GOTERM_BP_FAT	GO:0043254~regulation of protein complex assembly	5	0.0010781221371337472	ACTR3, CAPG, ARPC5, CAPZB, RASA1	69	90	13528	1.6508281792542823
GOTERM_BP_FAT	GO:0002478~antigen processing and presentation of exogenous peptide antigen	3	0.0013298229149990243	IFI30, HLA-DMA, HLA-DRA	69	11	13528	2.0325470367446474
GOTERM_BP_FAT	GO:0006508~proteolysis	14	0.002018159002689361	PPP2R5C, CDC16, HERC1, CTSK, PSEN1, CTSO, PSMD10, CACYBP, WSB2, LTA4H, C2, RNF34, PRSS23, CASP1	69	1054	13528	3.06938511234498
GOTERM_BP_FAT	GO:0019884~antigen processing and presentation of exogenous antigen	3	0.00217892557955447	IFI30, HLA-DMA, HLA-DRA	69	14	13528	3.3100643713019573
GOTERM_BP_FAT	GO:0015031~protein transport	11	0.0045328621483365795	KDELR3, YWHAZ, PSEN1, ERP29, BET1, NUP37, COL1A1, TRAM1, HLA-DMA, SSR1, MUDENG	69	762	13528	6.770693672373707
GOTERM_BP_FAT	GO:0045184~establishment of protein localization	11	0.004833063096003579	KDELR3, YWHAZ, PSEN1, ERP29, BET1, NUP37, COL1A1, TRAM1, HLA-DMA, SSR1, MUDENG	69	769	13528	7.203608153499386
GOTERM_BP_FAT	GO:0044087~regulation of cellular component biogenesis	5	0.005636966968359647	ACTR3, CAPG, ARPC5, CAPZB, RASA1	69	142	13528	8.353663901598585
GOTERM_BP_FAT	GO:0006955~immune response	10	0.007379267952924163	YWHAZ, PSEN1, HLA-DPA1, C2, HLA-DMB, TRIM22, HLA-DMA, CXCL12, HLA-DQA1, HLA-DRA	69	690	13528	10.800585778014016
GOTERM_BP_FAT	GO:0048002~antigen processing and presentation of peptide antigen	3	0.008649930717144445	IFI30, HLA-DMA, HLA-DRA	69	28	13528	12.546452930765572
GOTERM_BP_FAT	GO:0002443~leukocyte mediated immunity	4	0.009234592817524732	YWHAZ, C2, HLA-DMA, HLA-DRA	69	86	13528	13.338986052116885
GOTERM_BP_FAT	GO:0030199~collagen fibril organization	3	0.009260724491752689	COL1A2, COL1A1, DPT	69	29	13528	13.374251291856055
GOTERM_BP_FAT	GO:0032535~regulation of cellular component size	6	0.011616490783557929	ACTR3, CAPG, ARPC5, CAPZB, CXCL12, RASA1	69	271	13528	16.498842178383555
GOTERM_BP_FAT	GO:0008104~protein localization	11	0.012232734403224888	KDELR3, YWHAZ, PSEN1, ERP29, BET1, NUP37, COL1A1, TRAM1, HLA-DMA, SSR1, MUDENG	69	882	13528	17.298632170774553
GOTERM_BP_FAT	GO:0046907~intracellular transport	9	0.016800844378359187	ATXN1, ARL1, YWHAZ, PSEN1, ERP29, BET1, TRAM1, SSR1, MUDENG	69	657	13528	23.007760864226846
GOTERM_BP_FAT	GO:0016485~protein processing	4	0.018755986368155033	PSEN1, PPP2R5C, C2, CASP1	69	112	13528	25.33677550341502
GOTERM_BP_FAT	GO:0043589~skin morphogenesis	2	0.01995754869303274	COL1A2, COL1A1	69	4	13528	26.73524193902439
GOTERM_BP_FAT	GO:0051604~protein maturation	4	0.0234531652548424	PSEN1, PPP2R5C, C2, CASP1	69	122	13528	30.66567692346853
GOTERM_BP_FAT	GO:0001957~intramembranous ossification	2	0.024885298373365648	CTSK, COL1A1	69	5	13528	32.2182713609807
GOTERM_BP_FAT	GO:0022604~regulation of cell morphogenesis	4	0.02817798384626203	ACTR3, PSEN1, RASA1, TTC3	69	131	13528	35.665466316928295
GOTERM_BP_FAT	GO:0002252~immune effector process	4	0.02985741403266687	YWHAZ, C2, HLA-DMA, HLA-DRA	69	134	13528	37.35988725968444
GOTERM_BP_FAT	GO:0016064~immunoglobulin mediated immune response	3	0.03012168077836288	C2, HLA-DMA, HLA-DRA	69	54	13528	37.622681212761066
GOTERM_BP_FAT	GO:0051603~proteolysis involved in cellular protein catabolic process	8	0.030538253890896365	PSEN1, PSMD10, PPP2R5C, WSB2, CACYBP, CDC16, HERC1, RNF34	69	600	13528	38.03483996674834
GOTERM_BP_FAT	GO:0048584~positive regulation of response to stimulus	5	0.030857068567414755	PSEN1, C2, HLA-DMA, CXCL12, HLA-DRA	69	236	13528	38.34855422787663
GOTERM_BP_FAT	GO:0044257~cellular protein catabolic process	8	0.03125972455751448	PSEN1, PSMD10, PPP2R5C, WSB2, CACYBP, CDC16, HERC1, RNF34	69	603	13528	38.74264601698527
GOTERM_BP_FAT	GO:0002684~positive regulation of immune system process	5	0.031688672318411895	PSEN1, C2, HLA-DMA, CXCL12, HLA-DRA	69	238	13528	39.15987795349003
GOTERM_BP_FAT	GO:0019724~B cell mediated immunity	3	0.03220950368738242	C2, HLA-DMA, HLA-DRA	69	56	13528	39.662911250161095
GOTERM_BP_FAT	GO:0051129~negative regulation of cellular component organization	4	0.03458987590551942	PSEN1, CAPG, CAPZB, TTC3	69	142	13528	41.91282527707756
GOTERM_BP_FAT	GO:0001568~blood vessel development	5	0.03470317666718391	PSEN1, COL1A2, COL1A1, CXCL12, RASA1	69	245	13528	42.01793498215487
GOTERM_BP_FAT	GO:0030163~protein catabolic process	8	0.03609880564195015	PSEN1, PSMD10, PPP2R5C, WSB2, CACYBP, CDC16, HERC1, RNF34	69	622	13528	43.29816202227909
GOTERM_BP_FAT	GO:0050778~positive regulation of immune response	4	0.036459237490922905	PSEN1, C2, HLA-DMA, HLA-DRA	69	145	13528	43.62446848367894
GOTERM_BP_FAT	GO:0001944~vasculature development	5	0.037416175884534615	PSEN1, COL1A2, COL1A1, CXCL12, RASA1	69	251	13528	44.482304460906555
GOTERM_BP_FAT	GO:0002449~lymphocyte mediated immunity	3	0.048306534811247775	C2, HLA-DMA, HLA-DRA	69	70	13528	53.42242240306136
GOTERM_BP_FAT	GO:0010812~negative regulation of cell-substrate adhesion	2	0.05394323976585076	COL1A1, RASA1	69	11	13528	57.502326280977286
GOTERM_BP_FAT	GO:0001775~cell activation	5	0.05620883551747552	YWHAZ, PSEN1, ENTPD1, HLA-DMA, CXCL12	69	287	13528	59.04598289330632
GOTERM_BP_FAT	GO:0002460~adaptive immune response based on somatic recombination of immune receptors built from immunoglobulin superfamily domains	3	0.05724201854402898	C2, HLA-DMA, HLA-DRA	69	77	13528	59.732386996391796
GOTERM_BP_FAT	GO:0002250~adaptive immune response	3	0.05724201854402898	C2, HLA-DMA, HLA-DRA	69	77	13528	59.732386996391796
GOTERM_BP_FAT	GO:0010769~regulation of cell morphogenesis involved in differentiation	3	0.05724201854402898	ACTR3, PSEN1, TTC3	69	77	13528	59.732386996391796
GOTERM_BP_FAT	GO:0006613~cotranslational protein targeting to membrane	2	0.05870256947719251	TRAM1, SSR1	69	12	13528	60.684379031102445
GOTERM_BP_FAT	GO:0007155~cell adhesion	8	0.061112704671705695	ISLR, PLXNC1, PSEN1, NID2, ENTPD1, CXCL12, CDH11, DPT	69	700	13528	62.2094255202239
GOTERM_BP_FAT	GO:0022610~biological adhesion	8	0.06148925278471048	ISLR, PLXNC1, PSEN1, NID2, ENTPD1, CXCL12, CDH11, DPT	69	701	13528	62.44263352242798
GOTERM_BP_FAT	GO:0019941~modification-dependent protein catabolic process	7	0.06803013112251693	PSMD10, PPP2R5C, WSB2, CACYBP, CDC16, HERC1, RNF34	69	574	13528	66.28495873230675
GOTERM_BP_FAT	GO:0043632~modification-dependent macromolecule catabolic process	7	0.06803013112251693	PSMD10, PPP2R5C, WSB2, CACYBP, CDC16, HERC1, RNF34	69	574	13528	66.28495873230675
GOTERM_BP_FAT	GO:0044265~cellular macromolecule catabolic process	8	0.07096121853799067	PSEN1, PSMD10, PPP2R5C, WSB2, CACYBP, CDC16, HERC1, RNF34	69	725	13528	67.88463138287771
GOTERM_BP_FAT	GO:0001501~skeletal system development	5	0.07648988794882475	CTSK, PSEN1, COL1A2, COL1A1, CDH11	69	319	13528	70.71053431468353
GOTERM_BP_FAT	GO:0006928~cell motion	6	0.09020587053585524	ACTR3, TNS3, PSEN1, ARPC5, CAPZB, CXCL12	69	475	13528	76.74966643603888
GOTERM_BP_FAT	GO:0043161~proteasomal ubiquitin-dependent protein catabolic process	3	0.09313021840197055	PSMD10, PPP2R5C, CDC16	69	102	13528	77.87655197411466
GOTERM_BP_FAT	GO:0010498~proteasomal protein catabolic process	3	0.09313021840197055	PSMD10, PPP2R5C, CDC16	69	102	13528	77.87655197411466
GOTERM_BP_FAT	GO:0030198~extracellular matrix organization	3	0.09623101111058863	COL1A2, COL1A1, DPT	69	104	13528	79.0155077336807
GOTERM_BP_FAT	GO:0009057~macromolecule catabolic process	8	0.09632206387533357	PSEN1, PSMD10, PPP2R5C, WSB2, CACYBP, CDC16, HERC1, RNF34	69	781	13528	79.04810849939626

## Sheet: CG Low MF
Category	Term	Count	p value	Genes	List Total	Pop Hits	Pop Total	BH-adjusted p value
GOTERM_MF_FAT	GO:0032395~MHC class II receptor activity	4	7.79286498689637E-5	HLA-DPA1, HLA-DMA, HLA-DQA1, HLA-DRA	59	19	12983	0.09493556089683608
GOTERM_MF_FAT	GO:0042288~MHC class I protein binding	3	0.0022609474806151745	HLA-DMB, HLA-DMA, HLA-DRA	59	16	12983	2.720986108707968
GOTERM_MF_FAT	GO:0008233~peptidase activity	9	0.0037877767396447106	CTSK, PSEN1, CTSO, PPP2R5C, ABHD10, LTA4H, C2, CASP1, PRSS23	59	574	12983	4.519854990794181
GOTERM_MF_FAT	GO:0042287~MHC protein binding	3	0.005508520839470837	HLA-DMB, HLA-DMA, HLA-DRA	59	25	12983	6.510559022544071
GOTERM_MF_FAT	GO:0070011~peptidase activity, acting on L-amino acid peptides	8	0.010803752173398363	CTSK, PSEN1, CTSO, ABHD10, LTA4H, C2, CASP1, PRSS23	59	549	12983	12.399994845769214
GOTERM_MF_FAT	GO:0042277~peptide binding	5	0.01275517007835659	KDELR3, HLA-DMB, HLA-DMA, SSR1, HLA-DRA	59	203	12983	14.48307609928331
GOTERM_MF_FAT	GO:0003779~actin binding	6	0.014968909851545463	ACTR3, LASP1, CAPG, MARCKS, ARPC5, CAPZB	59	326	12983	16.79107022921542
GOTERM_MF_FAT	GO:0004175~endopeptidase activity	6	0.025686289910669048	CTSK, PSEN1, CTSO, C2, CASP1, PRSS23	59	375	12983	27.177640256231996
GOTERM_MF_FAT	GO:0004197~cysteine-type endopeptidase activity	3	0.04107007341124057	CTSK, CTSO, CASP1	59	72	12983	40.01754847046188
GOTERM_MF_FAT	GO:0048407~platelet-derived growth factor binding	2	0.04807620934561109	COL1A2, COL1A1	59	11	12983	45.145759341155326
GOTERM_MF_FAT	GO:0030674~protein binding, bridging	3	0.06602756246259842	SH3BGRL, LASP1, COL1A2	59	94	12983	56.504834577111886
GOTERM_MF_FAT	GO:0008092~cytoskeletal protein binding	6	0.07382743538409965	ACTR3, LASP1, CAPG, MARCKS, ARPC5, CAPZB	59	504	12983	60.730836511228695
GOTERM_MF_FAT	GO:0005048~signal sequence binding	2	0.08571552760314632	KDELR3, SSR1	59	20	12983	66.45159807248311

## Sheet: CG Low KEGG
Category	Term	Count	p value	Genes	List Total	Pop Hits	Pop Total	BH-adjusted p value
KEGG_PATHWAY	hsa04672:Intestinal immune network for IgA production	6	2.3317603293198266E-5	HLA-DPA1, HLA-DMB, HLA-DMA, CXCL12, HLA-DQA1, HLA-DRA	38	49	5085	0.023282108189193185
KEGG_PATHWAY	hsa05310:Asthma	5	4.949488689591578E-5	HLA-DPA1, HLA-DMB, HLA-DMA, HLA-DQA1, HLA-DRA	38	29	5085	0.04941373172895336
KEGG_PATHWAY	hsa05330:Allograft rejection	5	1.1836409428416834E-4	HLA-DPA1, HLA-DMB, HLA-DMA, HLA-DQA1, HLA-DRA	38	36	5085	0.11813346015548953
KEGG_PATHWAY	hsa05332:Graft-versus-host disease	5	1.6271786675873891E-4	HLA-DPA1, HLA-DMB, HLA-DMA, HLA-DQA1, HLA-DRA	38	39	5085	0.16236845283349455
KEGG_PATHWAY	hsa04940:Type I diabetes mellitus	5	2.180058557393981E-4	HLA-DPA1, HLA-DMB, HLA-DMA, HLA-DQA1, HLA-DRA	38	42	5085	0.2174836965765259
KEGG_PATHWAY	hsa04612:Antigen processing and presentation	6	2.9682993208280945E-4	IFI30, HLA-DPA1, HLA-DMB, HLA-DMA, HLA-DQA1, HLA-DRA	38	83	5085	0.29601414713236185
KEGG_PATHWAY	hsa05320:Autoimmune thyroid disease	5	4.6449296115766496E-4	HLA-DPA1, HLA-DMB, HLA-DMA, HLA-DQA1, HLA-DRA	38	51	5085	0.46286768690577684
KEGG_PATHWAY	hsa05322:Systemic lupus erythematosus	6	6.7211939350484E-4	HLA-DPA1, C2, HLA-DMB, HLA-DMA, HLA-DQA1, HLA-DRA	38	99	5085	0.6691434239557204
KEGG_PATHWAY	hsa05416:Viral myocarditis	5	0.0016279215953453065	HLA-DPA1, HLA-DMB, HLA-DMA, HLA-DQA1, HLA-DRA	38	71	5085	1.6137752578140208
KEGG_PATHWAY	hsa04514:Cell adhesion molecules (CAMs)	5	0.014766414328140524	HLA-DPA1, HLA-DMB, HLA-DMA, HLA-DQA1, HLA-DRA	38	132	5085	13.80468293161412
KEGG_PATHWAY	hsa04114:Oocyte meiosis	4	0.04495489548520877	YWHAZ, PPP2R5C, CDC16, PRKACB	38	110	5085	36.82837970500012
KEGG_PATHWAY	hsa04310:Wnt signaling pathway	4	0.09587514790775777	PSEN1, PPP2R5C, CACYBP, PRKACB	38	151	5085	63.44855148898774
