# Supplementary material for: Identification of rheumatoid arthritis and osteoarthritis patients by transcriptome-based rule set generation
Source: Arthritis Res Ther. 2014 Apr 1;16(2):R84. doi: 10.1186/ar4526 (PMC4060460; doi:10.1186/ar4526)
Supplement: Additional file 10 — Gene enrichment analysis for molecular interpretation (RA). Gene enrichment analysis for molecular interpretation of the obtained rule set for the conclusion ‘RA’ using the GO terms biological process (BP) and molecular function (MF), as well as KEGG pathways. The analyses were performed separately for the ‘RA’ rules showing a high or low expression level. In the case of ‘RA’ rules showing a low expression level, there were only results for the GO terms BP and MF. Category = type of term (GO term/KEEG pathway); Term = denomination of term (interesting terms highlighted in grey); Count = list hits; number of genes in the rule set belonging to the term in question; p value = EASE score (upper boundary of the distribution of Jackknife Fisher exact probabilities given the actual Count, List Total, Pop Hits, and Pop Total); Genes = gene symbols of included rules/genes; List Total = number of genes in the rule set (for high and low expression, respectively); Pop Hits = number of genes in the population background belonging to the specific term; Pop Total = number of genes in the population background; BH-adjusted p value = Benjamini-Hochberg adjusted P value (threshold P ≤ 0.05 indicated by fat frame). [file ar4526-S10.xls]

## Sheet: RA High BP
Category	Term	Count	p value	Genes	List Total	Pop Hits	Pop Total	BH-adjusted p value
GOTERM_BP_FAT	GO:0006955~immune response	12	2.245993217815801E-5	LY75, PTPRC, TNFSF10, PLCG2, MALT1, FAS, WAS, GBP2, PSMB9, TAPBP, GCH1, GBP1	49	690	13528	0.033826590011099
GOTERM_BP_FAT	GO:0002237~response to molecule of bacterial origin	5	2.3933496027730633E-4	PLCG2, MALT1, SERPINA1, STAT1, GCH1	49	86	13528	0.35990988500758103
GOTERM_BP_FAT	GO:0006952~defense response	10	2.6718162623557925E-4	LY75, ITK, PTPRC, MALT1, SERPINA1, ALOX5, MX2, WAS, TAPBP, GCH1	49	615	13528	0.40170683394510354
GOTERM_BP_FAT	GO:0043067~regulation of programmed cell death	11	4.6678028313461306E-4	PTPRC, TNFSF10, GIMAP5, TXNDC5, TNFAIP8, PLCG2, MALT1, STK17A, FAS, STAT1, GCH1	49	812	13528	0.700819176076728
GOTERM_BP_FAT	GO:0030098~lymphocyte differentiation	5	4.7680129852689245E-4	PTPRC, GIMAP5, PLCG2, MALT1, FAS	49	103	13528	0.7158142258661293
GOTERM_BP_FAT	GO:0010941~regulation of cell death	11	4.8058412638242367E-4	PTPRC, TNFSF10, GIMAP5, TXNDC5, TNFAIP8, PLCG2, MALT1, STK17A, FAS, STAT1, GCH1	49	815	13528	0.7214741496999078
GOTERM_BP_FAT	GO:0046649~lymphocyte activation	6	6.711385107024964E-4	PTPRC, GIMAP5, PLCG2, MALT1, FAS, WAS	49	199	13528	1.0061950157842503
GOTERM_BP_FAT	GO:0042110~T cell activation	5	0.0010169574985968949	PTPRC, GIMAP5, MALT1, FAS, WAS	49	126	13528	1.520961574949542
GOTERM_BP_FAT	GO:0002521~leukocyte differentiation	5	0.0011751344607903616	PTPRC, GIMAP5, PLCG2, MALT1, FAS	49	131	13528	1.7555809168725345
GOTERM_BP_FAT	GO:0045321~leukocyte activation	6	0.001607715881918046	PTPRC, GIMAP5, PLCG2, MALT1, FAS, WAS	49	242	13528	2.394554177598618
GOTERM_BP_FAT	GO:0042981~regulation of apoptosis	10	0.0018260179960676599	PTPRC, TNFSF10, GIMAP5, TXNDC5, TNFAIP8, MALT1, STK17A, FAS, STAT1, GCH1	49	804	13528	2.7155368144181846
GOTERM_BP_FAT	GO:0032496~response to lipopolysaccharide	4	0.0025511506767741084	PLCG2, SERPINA1, STAT1, GCH1	49	77	13528	3.774683184166494
GOTERM_BP_FAT	GO:0050852~T cell receptor signaling pathway	3	0.0029742061825124566	PTPRC, PLCG2, MALT1	49	23	13528	4.38762558589183
GOTERM_BP_FAT	GO:0001775~cell activation	6	0.0033713972202747064	PTPRC, GIMAP5, PLCG2, MALT1, FAS, WAS	49	287	13528	4.959774877763534
GOTERM_BP_FAT	GO:0009617~response to bacterium	5	0.004787906655050751	PLCG2, MALT1, SERPINA1, STAT1, GCH1	49	193	13528	6.974318928848522
GOTERM_BP_FAT	GO:0002824~positive regulation of adaptive immune response based on somatic recombination of immune receptors built from immunoglobulin superfamily domains	3	0.005033588729909049	PTPRC, GIMAP5, MALT1	49	30	13528	7.31964179349851
GOTERM_BP_FAT	GO:0002821~positive regulation of adaptive immune response	3	0.0053686123924708935	PTPRC, GIMAP5, MALT1	49	31	13528	7.788611892367903
GOTERM_BP_FAT	GO:0050851~antigen receptor-mediated signaling pathway	3	0.006068550395229683	PTPRC, PLCG2, MALT1	49	33	13528	8.761252965835475
GOTERM_BP_FAT	GO:0002708~positive regulation of lymphocyte mediated immunity	3	0.006433320981998702	PTPRC, GIMAP5, MALT1	49	34	13528	9.26433715357401
GOTERM_BP_FAT	GO:0002705~positive regulation of leukocyte mediated immunity	3	0.006433320981998702	PTPRC, GIMAP5, MALT1	49	34	13528	9.26433715357401
GOTERM_BP_FAT	GO:0009615~response to virus	4	0.0067645029706129445	IRF9, PTPRC, STAT1, MX2	49	109	13528	9.718852391781951
GOTERM_BP_FAT	GO:0002429~immune response-activating cell surface receptor signaling pathway	3	0.008402347542942439	PTPRC, PLCG2, MALT1	49	39	13528	11.935553633414697
GOTERM_BP_FAT	GO:0043069~negative regulation of programmed cell death	6	0.008601281191315915	GIMAP5, TXNDC5, TNFAIP8, PLCG2, MALT1, FAS	49	359	13528	12.201307251388293
GOTERM_BP_FAT	GO:0006468~protein amino acid phosphorylation	8	0.008679108880497909	ITK, PTPRC, PTPRE, STK38, STK10, PIK3CD, STK17A, STAT1	49	667	13528	12.305072631686532
GOTERM_BP_FAT	GO:0060548~negative regulation of cell death	6	0.008699507376822254	GIMAP5, TXNDC5, TNFAIP8, PLCG2, MALT1, FAS	49	360	13528	12.332250406599265
GOTERM_BP_FAT	GO:0002700~regulation of production of molecular mediator of immune response	3	0.009256396347415872	PTPRC, GIMAP5, MALT1	49	41	13528	13.071186328328787
GOTERM_BP_FAT	GO:0030097~hemopoiesis	5	0.009637479335383066	PTPRC, GIMAP5, PLCG2, MALT1, FAS	49	236	13528	13.573489778002724
GOTERM_BP_FAT	GO:0002768~immune response-regulating cell surface receptor signaling pathway	3	0.00969738011357833	PTPRC, PLCG2, MALT1	49	42	13528	13.652197785027088
GOTERM_BP_FAT	GO:0002699~positive regulation of immune effector process	3	0.010606924065151487	PTPRC, GIMAP5, MALT1	49	44	13528	14.839121536319865
GOTERM_BP_FAT	GO:0048534~hemopoietic or lymphoid organ development	5	0.013380121003926701	PTPRC, GIMAP5, PLCG2, MALT1, FAS	49	260	13528	18.364704747335082
GOTERM_BP_FAT	GO:0002757~immune response-activating signal transduction	3	0.01460291071598732	PTPRC, PLCG2, MALT1	49	52	13528	19.875541007779308
GOTERM_BP_FAT	GO:0050778~positive regulation of immune response	4	0.014674601009237523	PTPRC, GIMAP5, PLCG2, MALT1	49	145	13528	19.9633037934394
GOTERM_BP_FAT	GO:0043632~modification-dependent macromolecule catabolic process	7	0.015356294392809874	CYLD, PSME2, ATG4A, UBE2J1, UBE2L6, MALT1, PSMB9	49	574	13528	20.79335596913473
GOTERM_BP_FAT	GO:0019941~modification-dependent protein catabolic process	7	0.015356294392809874	CYLD, PSME2, ATG4A, UBE2J1, UBE2L6, MALT1, PSMB9	49	574	13528	20.79335596913473
GOTERM_BP_FAT	GO:0051249~regulation of lymphocyte activation	4	0.015496412019742264	PTPRC, GIMAP5, MALT1, FAS	49	148	13528	20.962968967386807
GOTERM_BP_FAT	GO:0002706~regulation of lymphocyte mediated immunity	3	0.015688711720249902	PTPRC, GIMAP5, MALT1	49	54	13528	21.195196602279786
GOTERM_BP_FAT	GO:0002822~regulation of adaptive immune response based on somatic recombination of immune receptors built from immunoglobulin superfamily domains	3	0.0162442747996214	PTPRC, GIMAP5, MALT1	49	55	13528	21.86253969027041
GOTERM_BP_FAT	GO:0002520~immune system development	5	0.016329131667114433	PTPRC, GIMAP5, PLCG2, MALT1, FAS	49	276	13528	21.964004158762084
GOTERM_BP_FAT	GO:0002819~regulation of adaptive immune response	3	0.01680819413389851	PTPRC, GIMAP5, MALT1	49	56	13528	22.53452175519135
GOTERM_BP_FAT	GO:0002764~immune response-regulating signal transduction	3	0.01680819413389851	PTPRC, PLCG2, MALT1	49	56	13528	22.53452175519135
GOTERM_BP_FAT	GO:0044093~positive regulation of molecular function	7	0.01684895208666134	PTPRC, PSME2, PLCG2, MALT1, STAT1, PSMB9, GCH1	49	586	13528	22.582880396875595
GOTERM_BP_FAT	GO:0043065~positive regulation of apoptosis	6	0.01767777250995302	PTPRC, TNFSF10, STK17A, FAS, STAT1, GCH1	49	430	13528	23.56016930898317
GOTERM_BP_FAT	GO:0043068~positive regulation of programmed cell death	6	0.01816255631743422	PTPRC, TNFSF10, STK17A, FAS, STAT1, GCH1	49	433	13528	24.12644219729998
GOTERM_BP_FAT	GO:0010942~positive regulation of cell death	6	0.01849062659239863	PTPRC, TNFSF10, STK17A, FAS, STAT1, GCH1	49	435	13528	24.507434324354747
GOTERM_BP_FAT	GO:0051603~proteolysis involved in cellular protein catabolic process	7	0.018714912662521684	CYLD, PSME2, ATG4A, UBE2J1, UBE2L6, MALT1, PSMB9	49	600	13528	24.76687179910204
GOTERM_BP_FAT	GO:0044257~cellular protein catabolic process	7	0.01913262557462288	CYLD, PSME2, ATG4A, UBE2J1, UBE2L6, MALT1, PSMB9	49	603	13528	25.247833743223303
GOTERM_BP_FAT	GO:0002703~regulation of leukocyte mediated immunity	3	0.019750917288286637	PTPRC, GIMAP5, MALT1	49	61	13528	25.954478822102466
GOTERM_BP_FAT	GO:0002694~regulation of leukocyte activation	4	0.020968065209030797	PTPRC, GIMAP5, MALT1, FAS	49	166	13528	27.327370337632907
GOTERM_BP_FAT	GO:0045619~regulation of lymphocyte differentiation	3	0.02098429674219423	PTPRC, GIMAP5, FAS	49	63	13528	27.345517189659684
GOTERM_BP_FAT	GO:0002925~positive regulation of humoral immune response mediated by circulating immunoglobulin	2	0.02110508960125354	PTPRC, GIMAP5	49	6	13528	27.48043076148865
GOTERM_BP_FAT	GO:0046645~positive regulation of gamma-delta T cell activation	2	0.02110508960125354	PTPRC, GIMAP5	49	6	13528	27.48043076148865
GOTERM_BP_FAT	GO:0045588~positive regulation of gamma-delta T cell differentiation	2	0.02110508960125354	PTPRC, GIMAP5	49	6	13528	27.48043076148865
GOTERM_BP_FAT	GO:0046643~regulation of gamma-delta T cell activation	2	0.02110508960125354	PTPRC, GIMAP5	49	6	13528	27.48043076148865
GOTERM_BP_FAT	GO:0045586~regulation of gamma-delta T cell differentiation	2	0.02110508960125354	PTPRC, GIMAP5	49	6	13528	27.48043076148865
GOTERM_BP_FAT	GO:0002922~positive regulation of humoral immune response	2	0.02110508960125354	PTPRC, GIMAP5	49	6	13528	27.48043076148865
GOTERM_BP_FAT	GO:0002335~mature B cell differentiation	2	0.02110508960125354	PLCG2, MALT1	49	6	13528	27.48043076148865
GOTERM_BP_FAT	GO:0016310~phosphorylation	8	0.02181471690554128	ITK, PTPRC, PTPRE, STK38, STK10, PIK3CD, STK17A, STAT1	49	800	13528	28.2683022750975
GOTERM_BP_FAT	GO:0030163~protein catabolic process	7	0.021928642276084973	CYLD, PSME2, ATG4A, UBE2J1, UBE2L6, MALT1, PSMB9	49	622	13528	28.394042192968506
GOTERM_BP_FAT	GO:0030217~T cell differentiation	3	0.022249100359902456	PTPRC, GIMAP5, FAS	49	65	13528	28.746630524708895
GOTERM_BP_FAT	GO:0050865~regulation of cell activation	4	0.02405385146161254	PTPRC, GIMAP5, MALT1, FAS	49	175	13528	30.702252272105856
GOTERM_BP_FAT	GO:0002923~regulation of humoral immune response mediated by circulating immunoglobulin	2	0.02457994211534617	PTPRC, GIMAP5	49	7	13528	31.262818323945417
GOTERM_BP_FAT	GO:0006917~induction of apoptosis	5	0.026443838912710356	TNFSF10, STK17A, FAS, STAT1, GCH1	49	320	13528	33.214973112249844
GOTERM_BP_FAT	GO:0012502~induction of programmed cell death	5	0.02670918346309905	TNFSF10, STK17A, FAS, STAT1, GCH1	49	321	13528	33.488635118963685
GOTERM_BP_FAT	GO:0045060~negative thymic T cell selection	2	0.028042715784481143	PTPRC, FAS	49	8	13528	34.84818728500443
GOTERM_BP_FAT	GO:0042113~B cell activation	3	0.029745700902289746	PTPRC, PLCG2, MALT1	49	76	13528	36.54668830094896
GOTERM_BP_FAT	GO:0050870~positive regulation of T cell activation	3	0.029745700902289746	PTPRC, GIMAP5, MALT1	49	76	13528	36.54668830094896
GOTERM_BP_FAT	GO:0007242~intracellular signaling cascade	10	0.030546529835760762	ITK, PTPRC, STK38, PIK3CD, PLCG2, IQGAP2, RALA, MALT1, STK17A, STAT1	49	1256	13528	37.331034947161136
GOTERM_BP_FAT	GO:0006508~proteolysis	9	0.030660004999810187	LAP3, CYLD, PSME2, ATG4A, UBE2J1, SPCS3, UBE2L6, MALT1, PSMB9	49	1054	13528	37.441439586852496
GOTERM_BP_FAT	GO:0043383~negative T cell selection	2	0.03149345170623151	PTPRC, FAS	49	9	13528	38.24678656310693
GOTERM_BP_FAT	GO:0034097~response to cytokine stimulus	3	0.03194229608259999	SERPINA1, STAT1, GCH1	49	79	13528	38.676477759295125
GOTERM_BP_FAT	GO:0002720~positive regulation of cytokine production during immune response	2	0.03493219083668637	GIMAP5, MALT1	49	10	13528	41.46833262387466
GOTERM_BP_FAT	GO:0002683~negative regulation of immune system process	3	0.03496765659080406	PTPRC, GIMAP5, FAS	49	83	13528	41.5007254178751
GOTERM_BP_FAT	GO:0043085~positive regulation of catalytic activity	6	0.03626708729402229	PTPRC, PSME2, MALT1, STAT1, PSMB9, GCH1	49	520	13528	42.676090468552886
GOTERM_BP_FAT	GO:0043066~negative regulation of apoptosis	5	0.0363786788744872	GIMAP5, TXNDC5, TNFAIP8, MALT1, FAS	49	354	13528	42.775992734293325
GOTERM_BP_FAT	GO:0006916~anti-apoptosis	4	0.03646902146423534	TXNDC5, TNFAIP8, MALT1, FAS	49	206	13528	42.856752767305665
GOTERM_BP_FAT	GO:0002714~positive regulation of B cell mediated immunity	2	0.03835897400219473	PTPRC, GIMAP5	49	11	13528	44.52203711615981
GOTERM_BP_FAT	GO:0002891~positive regulation of immunoglobulin mediated immune response	2	0.03835897400219473	PTPRC, GIMAP5	49	11	13528	44.52203711615981
GOTERM_BP_FAT	GO:0007243~protein kinase cascade	5	0.041712555313910264	PTPRC, STK38, MALT1, STK17A, STAT1	49	370	13528	47.365950393931385
GOTERM_BP_FAT	GO:0050854~regulation of antigen receptor-mediated signaling pathway	2	0.041773841890894337	PTPRC, MALT1	49	12	13528	47.41663305696285
GOTERM_BP_FAT	GO:0002920~regulation of humoral immune response	2	0.041773841890894337	PTPRC, GIMAP5	49	12	13528	47.41663305696285
GOTERM_BP_FAT	GO:0044265~cellular macromolecule catabolic process	7	0.041982185136602096	CYLD, PSME2, ATG4A, UBE2J1, UBE2L6, MALT1, PSMB9	49	725	13528	47.58858785844012
GOTERM_BP_FAT	GO:0002253~activation of immune response	3	0.043829166820060134	PTPRC, PLCG2, MALT1	49	94	13528	49.090191460987256
GOTERM_BP_FAT	GO:0045061~thymic T cell selection	2	0.04517683505365136	PTPRC, FAS	49	13	13528	50.16039966879517
GOTERM_BP_FAT	GO:0051251~positive regulation of lymphocyte activation	3	0.04637709273235315	PTPRC, GIMAP5, MALT1	49	97	13528	51.09582635092123
GOTERM_BP_FAT	GO:0002697~regulation of immune effector process	3	0.04985738851981687	PTPRC, GIMAP5, MALT1	49	101	13528	53.71637998803346
GOTERM_BP_FAT	GO:0006366~transcription from RNA polymerase II promoter	4	0.050021639923339	MSL3, IRF9, NFE2L3, STAT1	49	234	13528	53.83675549950602
GOTERM_BP_FAT	GO:0048584~positive regulation of response to stimulus	4	0.0510723603098545	PTPRC, GIMAP5, PLCG2, MALT1	49	236	13528	54.59991204920127
GOTERM_BP_FAT	GO:0002702~positive regulation of production of molecular mediator of immune response	2	0.051947358735973594	GIMAP5, MALT1	49	15	13528	55.2264329115401
GOTERM_BP_FAT	GO:0002711~positive regulation of T cell mediated immunity	2	0.051947358735973594	PTPRC, MALT1	49	15	13528	55.2264329115401
GOTERM_BP_FAT	GO:0002684~positive regulation of immune system process	4	0.05213389424793881	PTPRC, GIMAP5, PLCG2, MALT1	49	238	13528	55.35894892980383
GOTERM_BP_FAT	GO:0016192~vesicle-mediated transport	6	0.052356078686892876	LY75, FNBP1, MARCKSL1, TXNDC5, WAS, TAPBP	49	576	13528	55.51631233303584
GOTERM_BP_FAT	GO:0006796~phosphate metabolic process	8	0.054307094488404345	ITK, PTPRC, PTPRE, STK38, STK10, PIK3CD, STK17A, STAT1	49	973	13528	56.876060446278174
GOTERM_BP_FAT	GO:0006793~phosphorus metabolic process	8	0.054307094488404345	ITK, PTPRC, PTPRE, STK38, STK10, PIK3CD, STK17A, STAT1	49	973	13528	56.876060446278174
GOTERM_BP_FAT	GO:0002696~positive regulation of leukocyte activation	3	0.05433670760038427	PTPRC, GIMAP5, MALT1	49	106	13528	56.89639689375521
GOTERM_BP_FAT	GO:0009057~macromolecule catabolic process	7	0.05664766402536805	CYLD, PSME2, ATG4A, UBE2J1, UBE2L6, MALT1, PSMB9	49	781	13528	58.45609240724168
GOTERM_BP_FAT	GO:0050867~positive regulation of cell activation	3	0.05895354939017175	PTPRC, GIMAP5, MALT1	49	111	13528	59.95972001799574
GOTERM_BP_FAT	GO:0006915~apoptosis	6	0.061061405093423435	TNFSF10, TNFAIP8, STK17A, FAS, STAT1, DRAM1	49	602	13528	61.28961687568133
GOTERM_BP_FAT	GO:0002718~regulation of cytokine production during immune response	2	0.062015089883555204	GIMAP5, MALT1	49	18	13528	61.87766706227568
GOTERM_BP_FAT	GO:0012501~programmed cell death	6	0.06425858042126723	TNFSF10, TNFAIP8, STK17A, FAS, STAT1, DRAM1	49	611	13528	63.22829831834093
GOTERM_BP_FAT	GO:0050863~regulation of T cell activation	3	0.0646668404687486	PTPRC, GIMAP5, MALT1	49	117	13528	63.46922297721572
GOTERM_BP_FAT	GO:0045058~T cell selection	2	0.06534767875572796	PTPRC, FAS	49	19	13528	63.86772762073877
GOTERM_BP_FAT	GO:0031400~negative regulation of protein modification process	3	0.06661160591087575	PTPRC, PSME2, PSMB9	49	119	13528	64.59678322578434
GOTERM_BP_FAT	GO:0001912~positive regulation of leukocyte mediated cytotoxicity	2	0.07197811213861566	PTPRC, GIMAP5	49	21	13528	67.54200371289912
GOTERM_BP_FAT	GO:0002709~regulation of T cell mediated immunity	2	0.07197811213861566	PTPRC, MALT1	49	21	13528	67.54200371289912
GOTERM_BP_FAT	GO:0043029~T cell homeostasis	2	0.07197811213861566	GIMAP5, FAS	49	21	13528	67.54200371289912
GOTERM_BP_FAT	GO:0008633~activation of pro-apoptotic gene products	2	0.0752760354837146	TNFSF10, FAS	49	22	13528	69.23674177257499
GOTERM_BP_FAT	GO:0002889~regulation of immunoglobulin mediated immune response	2	0.08183749159046724	PTPRC, GIMAP5	49	24	13528	72.3657044645918
GOTERM_BP_FAT	GO:0031343~positive regulation of cell killing	2	0.08183749159046724	PTPRC, GIMAP5	49	24	13528	72.3657044645918
GOTERM_BP_FAT	GO:0002712~regulation of B cell mediated immunity	2	0.08183749159046724	PTPRC, GIMAP5	49	24	13528	72.3657044645918
GOTERM_BP_FAT	GO:0046907~intracellular transport	6	0.08206848485858337	GIMAP5, TXNDC5, ATG4A, MALT1, WAS, TAPBP	49	657	13528	72.4702434821224
GOTERM_BP_FAT	GO:0006351~transcription, DNA-dependent	4	0.08470196333662375	MSL3, IRF9, NFE2L3, STAT1	49	292	13528	73.63624809579365
GOTERM_BP_FAT	GO:0001910~regulation of leukocyte mediated cytotoxicity	2	0.08510110239915179	PTPRC, GIMAP5	49	25	13528	73.8088939232728
GOTERM_BP_FAT	GO:0032774~RNA biosynthetic process	4	0.08739806691943872	MSL3, IRF9, NFE2L3, STAT1	49	296	13528	74.78209517725634
GOTERM_BP_FAT	GO:0046635~positive regulation of alpha-beta T cell activation	2	0.08835335353576937	PTPRC, GIMAP5	49	26	13528	75.17681220195715
GOTERM_BP_FAT	GO:0042098~T cell proliferation	2	0.09159428369652663	PTPRC, MALT1	49	27	13528	76.47337999942238
GOTERM_BP_FAT	GO:0033077~T cell differentiation in the thymus	2	0.09159428369652663	PTPRC, FAS	49	27	13528	76.47337999942238
GOTERM_BP_FAT	GO:0031341~regulation of cell killing	2	0.09482393145448664	PTPRC, GIMAP5	49	28	13528	77.70231406525569
GOTERM_BP_FAT	GO:0002260~lymphocyte homeostasis	2	0.09482393145448664	GIMAP5, FAS	49	28	13528	77.70231406525569

## Sheet: RA High MF
Category	Term	Count	p value	Genes	List Total	Pop Hits	Pop Total	BH-adjusted p value
GOTERM_MF_FAT	GO:0005525~GTP binding	6	0.010748362496497188	GIMAP5, RALA, MX2, GBP2, GCH1, GBP1	48	372	12983	12.305228931270662
GOTERM_MF_FAT	GO:0019001~guanyl nucleotide binding	6	0.011957130982800422	GIMAP5, RALA, MX2, GBP2, GCH1, GBP1	48	382	12983	13.59840492136184
GOTERM_MF_FAT	GO:0032561~guanyl ribonucleotide binding	6	0.011957130982800422	GIMAP5, RALA, MX2, GBP2, GCH1, GBP1	48	382	12983	13.59840492136184
GOTERM_MF_FAT	GO:0008233~peptidase activity	7	0.016744587168855338	LAP3, CYLD, ATG4A, SPCS3, MALT1, SERPINA1, PSMB9	48	574	12983	18.550129894714185
GOTERM_MF_FAT	GO:0032555~purine ribonucleotide binding	13	0.027351889433373685	ITK, GIMAP5, STK38, STK10, PIK3CD, UBE2J1, STK17A, GCH1, WARS, RALA, MX2, GBP2, GBP1	48	1836	12983	28.607439201169772
GOTERM_MF_FAT	GO:0032553~ribonucleotide binding	13	0.027351889433373685	ITK, GIMAP5, STK38, STK10, PIK3CD, UBE2J1, STK17A, GCH1, WARS, RALA, MX2, GBP2, GBP1	48	1836	12983	28.607439201169772
GOTERM_MF_FAT	GO:0017076~purine nucleotide binding	13	0.03698520467423507	ITK, GIMAP5, STK38, STK10, PIK3CD, UBE2J1, STK17A, GCH1, WARS, RALA, MX2, GBP2, GBP1	48	1918	12983	36.74021344927301
GOTERM_MF_FAT	GO:0003924~GTPase activity	4	0.04068215788969773	RALA, MX2, GBP2, GBP1	48	211	12983	39.628689193555054
GOTERM_MF_FAT	GO:0019198~transmembrane receptor protein phosphatase activity	2	0.06323536966655924	PTPRC, PTPRE	48	18	12983	54.78439844837332
GOTERM_MF_FAT	GO:0042802~identical protein binding	6	0.08029531684441703	IRF9, FNBP1, PTPRE, FAS, WAS, GCH1	48	640	12983	63.83406070685442
GOTERM_MF_FAT	GO:0008234~cysteine-type peptidase activity	3	0.09228044081365802	CYLD, ATG4A, MALT1	48	141	12983	69.16241510286422
GOTERM_MF_FAT	GO:0004842~ubiquitin-protein ligase activity	3	0.09899513812208194	UBE2J1, UBE2L6, MALT1	48	147	12983	71.82269479452475
GOTERM_MF_FAT	GO:0000166~nucleotide binding	13	0.09998344756547337	ITK, GIMAP5, STK38, STK10, PIK3CD, UBE2J1, STK17A, GCH1, WARS, RALA, MX2, GBP2, GBP1	48	2245	12983	72.19595794092403

## Sheet: RA High KEGG
Category	Term	Count	p value	Genes	List Total	Pop Hits	Pop Total	BH-adjusted p value
KEGG_PATHWAY	hsa04666:Fc gamma R-mediated phagocytosis	5	0.0010704082419468117	PTPRC, MARCKSL1, PIK3CD, PLCG2, WAS	26	95	5085	1.0749618404333972
KEGG_PATHWAY	hsa04210:Apoptosis	4	0.00847704799313931	TNFSF10, PIK3CD, CSF2RB, FAS	26	87	5085	8.232391894979896
KEGG_PATHWAY	hsa04660:T cell receptor signaling pathway	4	0.015256917599132131	ITK, PTPRC, PIK3CD, MALT1	26	108	5085	14.37148384823368
KEGG_PATHWAY	hsa04650:Natural killer cell mediated cytotoxicity	4	0.026427682319459085	TNFSF10, PIK3CD, PLCG2, FAS	26	133	5085	23.683608133836277
KEGG_PATHWAY	hsa04630:Jak-STAT signaling pathway	4	0.03910077478139094	IRF9, PIK3CD, CSF2RB, STAT1	26	155	5085	33.13583743131061
KEGG_PATHWAY	hsa05212:Pancreatic cancer	3	0.04809897958721887	PIK3CD, RALA, STAT1	26	72	5085	39.19223836762742
KEGG_PATHWAY	hsa04662:B cell receptor signaling pathway	3	0.05175720760194913	PIK3CD, PLCG2, MALT1	26	75	5085	41.50973594767494
KEGG_PATHWAY	hsa04062:Chemokine signaling pathway	4	0.06217460069241168	ITK, PIK3CD, STAT1, WAS	26	187	5085	47.679848108563625
KEGG_PATHWAY	hsa05200:Pathways in cancer	5	0.07353049103244645	PIK3CD, PLCG2, RALA, FAS, STAT1	26	328	5085	53.73247476243714

## Sheet: RA Low BP
Category	Term	Count	p value	Genes	List Total	Pop Hits	Pop Total	BH-adjusted p value
GOTERM_BP_FAT	GO:0006916~anti-apoptosis	6	9.600078507162436E-5	SFRP1, CLU, HSPB1, BCL2L2, FOXC1, TCF7L2	32	206	13528	0.13943286287986245
GOTERM_BP_FAT	GO:0043066~negative regulation of apoptosis	6	0.0011571858745260959	SFRP1, CLU, HSPB1, BCL2L2, FOXC1, TCF7L2	32	354	13528	1.668698997085527
GOTERM_BP_FAT	GO:0043069~negative regulation of programmed cell death	6	0.001231779823311504	SFRP1, CLU, HSPB1, BCL2L2, FOXC1, TCF7L2	32	359	13528	1.775371194412001
GOTERM_BP_FAT	GO:0060548~negative regulation of cell death	6	0.0012471180289360105	SFRP1, CLU, HSPB1, BCL2L2, FOXC1, TCF7L2	32	360	13528	1.7972920534654824
GOTERM_BP_FAT	GO:0001501~skeletal system development	5	0.005776825098728625	FGFR1, MGP, FOXC1, ZEB1, IGFBP5	32	319	13528	8.075386688070886
GOTERM_BP_FAT	GO:0043009~chordate embryonic development	5	0.006574101704981535	DLC1, SFRP1, FOXC1, ZEB1, TCF7L2	32	331	13528	9.140937792991288
GOTERM_BP_FAT	GO:0009792~embryonic development ending in birth or egg hatching	5	0.006784326170408075	DLC1, SFRP1, FOXC1, ZEB1, TCF7L2	32	334	13528	9.419977948671487
GOTERM_BP_FAT	GO:0042981~regulation of apoptosis	7	0.008868165585483595	DLC1, SFRP1, CLU, HSPB1, BCL2L2, FOXC1, TCF7L2	32	804	13528	12.143118764145777
GOTERM_BP_FAT	GO:0043067~regulation of programmed cell death	7	0.009291632828444356	DLC1, SFRP1, CLU, HSPB1, BCL2L2, FOXC1, TCF7L2	32	812	13528	12.687096915493179
GOTERM_BP_FAT	GO:0010941~regulation of cell death	7	0.009454156762099873	DLC1, SFRP1, CLU, HSPB1, BCL2L2, FOXC1, TCF7L2	32	815	13528	12.895038020588846
GOTERM_BP_FAT	GO:0008283~cell proliferation	5	0.016820278021459783	LRP1, BCL2L2, FOXC1, ZEB1, TCF7L2	32	436	13528	21.84983811000797
GOTERM_BP_FAT	GO:0007160~cell-matrix adhesion	3	0.01758487801032386	DLC1, SNED1, ITGBL1	32	89	13528	22.728495774817393
GOTERM_BP_FAT	GO:0031589~cell-substrate adhesion	3	0.021073597363704056	DLC1, SNED1, ITGBL1	32	98	13528	26.62214033772129
GOTERM_BP_FAT	GO:0003006~reproductive developmental process	4	0.021646040620155904	SFRP1, BCL2L2, FOXC1, TCF7L2	32	262	13528	27.243298512102875
GOTERM_BP_FAT	GO:0008219~cell death	6	0.02252593189647326	PHLPP1, DLC1, GULP1, CLU, HSPB1, BCL2L2	32	719	13528	28.188528179397586
GOTERM_BP_FAT	GO:0016265~death	6	0.02313505380182037	PHLPP1, DLC1, GULP1, CLU, HSPB1, BCL2L2	32	724	13528	28.836169940938518
GOTERM_BP_FAT	GO:0001503~ossification	3	0.028374232181934744	MGP, FOXC1, IGFBP5	32	115	13528	34.18632786004825
GOTERM_BP_FAT	GO:0042127~regulation of cell proliferation	6	0.031754608891356645	DLC1, FGFR1, CLU, ZEB1, TENC1, IGFBP5	32	787	13528	37.43689213096977
GOTERM_BP_FAT	GO:0060348~bone development	3	0.03211377826220074	MGP, FOXC1, IGFBP5	32	123	13528	37.773337704450825
GOTERM_BP_FAT	GO:0048598~embryonic morphogenesis	4	0.03256185577934993	DLC1, FOXC1, ZEB1, TCF7L2	32	307	13528	38.19070443341121
GOTERM_BP_FAT	GO:0048608~reproductive structure development	3	0.03356392851389642	SFRP1, BCL2L2, FOXC1	32	126	13528	39.11468070118305
GOTERM_BP_FAT	GO:0051129~negative regulation of cellular component organization	3	0.04171861572230641	DLC1, CLU, MAP4	32	142	13528	46.169567114780754
GOTERM_BP_FAT	GO:0007548~sex differentiation	3	0.0466020096999847	BCL2L2, FOXC1, TCF7L2	32	151	13528	50.021813525008874
GOTERM_BP_FAT	GO:0006915~apoptosis	5	0.04716391717998104	PHLPP1, DLC1, GULP1, CLU, BCL2L2	32	602	13528	50.44820872911355
GOTERM_BP_FAT	GO:0008285~negative regulation of cell proliferation	4	0.048828375463597654	DLC1, ZEB1, TENC1, IGFBP5	32	361	13528	51.69146336322273
GOTERM_BP_FAT	GO:0012501~programmed cell death	5	0.04934806757731602	PHLPP1, DLC1, GULP1, CLU, BCL2L2	32	611	13528	52.07365274903768
GOTERM_BP_FAT	GO:0009628~response to abiotic stimulus	4	0.051184009770175024	SNN, HSPB1, CIRBP, MGP	32	368	13528	53.401406345996975
GOTERM_BP_FAT	GO:0007166~cell surface receptor linked signal transduction	9	0.053199670810777	FGFR1, LRP1, SFRP1, AXL, FOXC1, GNG12, CFD, TCF7L2, ITGBL1	32	1856	13528	54.8196413950018
GOTERM_BP_FAT	GO:0040007~growth	3	0.06552535362070064	FGFR1, FOXC1, IGFBP5	32	183	13528	62.65427639310032
GOTERM_BP_FAT	GO:0007155~cell adhesion	5	0.07396073494600047	DLC1, SNED1, FERMT2, MGP, ITGBL1	32	700	13528	67.26548599613736
GOTERM_BP_FAT	GO:0022610~biological adhesion	5	0.0742679917448219	DLC1, SNED1, FERMT2, MGP, ITGBL1	32	701	13528	67.4229842128728
GOTERM_BP_FAT	GO:0031016~pancreas development	2	0.0772502885739942	CLU, TCF7L2	32	35	13528	68.91545636332235
GOTERM_BP_FAT	GO:0035295~tube development	3	0.09002775377335945	DLC1, MGP, FOXC1	32	220	13528	74.617611477405
GOTERM_BP_FAT	GO:0009968~negative regulation of signal transduction	3	0.09072384817848703	DLC1, LRP1, IGFBP5	32	221	13528	74.89834757600603
GOTERM_BP_FAT	GO:0006956~complement activation	2	0.09199169226383799	CLU, CFD	32	42	13528	75.40225609550666
GOTERM_BP_FAT	GO:0007169~transmembrane receptor protein tyrosine kinase signaling pathway	3	0.09282193015701831	FGFR1, AXL, FOXC1	32	224	13528	75.7271154287502
GOTERM_BP_FAT	GO:0002541~activation of plasma proteins involved in acute inflammatory response	2	0.09407891290603103	CLU, CFD	32	43	13528	76.21135821213778

## Sheet: RA Low MF
Category	Term	Count	p value	Genes	List Total	Pop Hits	Pop Total	BH-adjusted p value
GOTERM_MF_FAT	GO:0008134~transcription factor binding	5	0.018052953880039087	DIP2C, GPX3, FOXC1, ZEB1, TCF7L2	27	513	12983	18.429231168009096
GOTERM_MF_FAT	GO:0008430~selenium binding	2	0.06220587868501265	GPX3, SELENBP1	27	32	12983	51.232947797797166
